# Supplementary material for: Chemoptogenetic ablation of neuronal mitochondria in vivo with spatiotemporal precision and controllable severity
Source: eLife. 2020 Mar 17;9:e51845. doi: 10.7554/eLife.51845 (PMC7077989; doi:10.7554/eLife.51845)
Supplement: Figure 2—source data 1. [file elife-51845-fig2-data1.xlsx]

## Sheet: Figure 2C
Movement (mm/s)
			Pre-light exposure																												Post-60J/cm2 @ 660nm
Non-Tg, no chemical		Time bin (minutes)	Individual larval mean swimmng speed in time bin for 24 larvae in each group (mm/s)																									group mean	group SE		Individual larval mean swimmng speed in time bin for 24 larvae in each group (mm/s)
		1	0.0485591	1.29759	0.555896	0.00471309	0.267486	0.701322	1.12884	1.75416	0.017669	1.07063	0.379168	0.00158586	2.37764	0.529798	1.86394	0.188267	0.0402798	2.05767	0.0050102	0.148771	0.00352964	1.91232	0.686446	1.07728		0.75494	0.156455		0.492322	1.32912	0.938907	0.732736	1.35863	0.0367999	0.146752	0.36903	0.456669	0.621034	0.321587	0.612508	0.24934	0.307196	0.539383	0.0101883	0.553374	0.0732473	0.660664
		2	0.127807	1.24731	0.676591	0.00350763	0.614239	1.03663	1.68924	1.57654	0.00769606	0.838045	0.200462	0.226211	2.34606	0.449212	1.9952	0.185454	0.000537142	1.95008	0.175586	0.507623	0.00333645	2.42239	0.954738	0.986442		0.842539	0.160064		0.000881509	1.55896	0.956407	0.561459	1.59643	0.287544	0.14655	0.555856	0.216583	0.801281	0.266272	0.3435	0.187302	0.445622	0.473685	0.0198239	0.601591	0.17545	0.538169
	(light)	3	0.0794674	1.26508	0.631738	0.00322671	0.990599	0.889485	1.31369	1.96639	0.0151452	1.5048	0.34442	0.169112	1.99906	0.602604	1.98285	0.22189	0.00595862	2.43597	0.298305	0.272785	0.239919	2.51531	1.05884	1.59709		0.933489	0.166827		0.147983	2.07728	1.13529	0.693391	0.64353	0.133057	0.193393	0.527865	0.660008	0.760658	0.290715	0.387866	0.337608	0.468898	0.699984	0.0142038	0.647496	0.118619	0.572359
		4	0.348984	1.414	0.681352	0.00246253	0.761924	0.950964	1.77077	1.63668	0.154288	1.36322	0.133205	0.0139836	2.37635	0.392072	1.91344	0.211198	0.00633183	2.08837	0.00892722	0.19395	0.0284156	2.61797	1.24583	1.67898		0.916402	0.174253		0.127371	1.94609	1.27412	0.668059	0.098533	0.616655	0.157122	0.718229	0.421135	0.838916	0.42047	0.576074	0.248052	0.462681	0.940974	0.0179898	0.874098	0.299453	0.554596
		5	0.130054	1.13759	1.02775	0.396628	1.5463	1.63257	2.01917	1.32562	0.555254	2.00432	1.04932	0.65518	2.1352	0.885169	1.92309	0.760102	0.55959	2.59768	0.078047	1.21735	0.562114	3.62224	1.45606	1.76743		1.29349	0.170062		0.670083	2.32269	1.38615	0.917713	0.477932	0.911289	0.165587	0.574198	0.635945	0.831521	0.268571	0.866673	0.202212	0.517777	0.888356	0.111287	0.805517	0.397042	0.649001
		6	3.35851	4.01067	2.44361	1.54658	4.81459	2.05813	3.20229	2.95876	4.57036	5.34961	4.30828	1.69378	3.76178	4.37798	3.17644	2.84274	1.85778	3.52232	2.54418	3.84436	1.96949	3.91923	2.91274	2.96903		3.25055	0.211281		3.44512	2.3272	2.64122	2.8181	5.71616	2.16367	1.77118	1.33801	1.54728	2.41384	2.32323	1.81028	1.24389	2.036	2.21144	2.9567	1.93589	1.92375	2.28892
		7	3.84868	3.79424	2.50813	2.51003	3.80971	2.01522	3.80912	3.02678	4.13217	5.15683	4.77631	2.14978	3.27934	4.30181	2.49335	2.89863	2.54679	3.9883	3.45552	3.98375	1.93691	5.03033	3.44488	3.43967		3.43068	0.188024		3.54984	2.11015	2.29717	2.36217	4.30831	2.70533	2.25606	1.86202	2.12336	2.03156	2.26805	1.7473	1.08264	1.94759	2.02837	3.10812	1.41694	1.86223	1.91715
		8	3.98743	4.29361	2.57947	2.94322	4.0573	2.98486	4.1025	3.13268	4.58166	5.15349	3.98897	2.06367	3.46032	4.46739	2.64455	2.69599	2.79125	4.25711	3.7073	3.32928	2.49754	5.63317	3.17548	3.79365		3.59675	0.18203		3.93913	2.16666	2.24293	2.32375	4.65478	2.63254	2.33493	2.14217	2.37181	1.99431	2.23268	2.0776	1.34869	1.85089	1.94938	3.36729	1.62262	2.05892	1.88104
		9	3.5887	4.41976	2.67486	2.86333	3.8132	2.61726	4.58468	3.03511	3.93062	4.85617	4.20566	2.46974	3.15156	4.19735	2.28513	2.8824	2.64053	3.78028	3.51402	3.63557	2.26189	5.78437	3.19011	4.28253		3.5277	0.183248		3.97806	2.06838	2.25879	2.78265	5.26099	2.46283	2.06922	1.96528	2.25163	1.67407	2.3453	2.03995	1.074	1.69491	1.91751	3.39315	1.59572	2.1093	1.75183
	(dark)	10	3.98002	4.07541	2.46113	3.00214	3.67518	2.57215	4.52449	2.80147	3.98422	5.17496	3.61669	2.56039	3.11001	3.97068	2.28311	3.01931	2.99641	3.85796	3.54121	3.85915	2.71139	5.64417	3.22416	4.12991		3.53232	0.172992		3.73128	2.1848	2.22204	2.69451	4.57865	2.76726	1.95504	1.96585	2.22489	1.80446	2.13504	2.2	1.18415	1.64087	1.81242	3.291	1.54865	2.11354	1.42361
		11	3.9523	3.84932	2.6806	2.89339	3.34755	2.63058	4.76738	2.91354	3.50324	4.64072	4.14524	2.3959	2.98889	4.31395	2.36496	2.96984	3.04578	3.99789	3.54076	3.35222	2.60491	5.19635	3.18411	4.00408		3.47015	0.159336		3.45391	2.00743	2.22701	2.68123	4.80104	2.64251	2.10857	2.0448	2.17183	1.54288	2.44152	1.93903	0.983918	1.64009	1.7805	3.08249	1.53813	1.93416	1.39746
		12	3.83373	3.76461	2.24197	2.54961	3.38573	2.53045	4.82691	2.72289	3.62727	4.00552	4.56853	2.52953	3.23504	4.10061	2.37305	2.82713	3.14667	3.93594	3.21073	3.80128	1.87384	5.09506	3.16177	3.9614		3.38789	0.171299		3.02146	1.8091	1.82899	2.68709	4.4053	2.51937	1.89179	1.93508	1.89887	1.51093	2.38986	1.87444	1.07328	1.70719	1.75138	3.07714	1.38578	1.55204	0.970257
		13	2.93176	3.94148	2.30364	2.91198	3.23888	2.70359	4.21473	2.67874	3.29878	4.16909	3.74571	2.38474	3.02685	4.30584	2.2949	2.94211	3.05349	3.66363	3.39523	3.65798	1.78678	5.49408	3.27246	3.24816		3.27769	0.163268		2.9865	1.89886	1.99871	2.50684	3.97738	2.61607	1.60283	1.77898	1.81173	1.09189	1.94395	1.74444	1.03126	1.34457	1.59181	2.79826	1.39207	1.21556	0.994501
		14	3.01059	3.4521	2.25556	2.77961	3.17648	2.59249	4.19954	2.92542	2.89562	4.48284	4.36842	2.50508	2.8403	3.88433	1.97682	2.91506	3.2557	3.92682	3.2768	3.35826	1.67258	5.86101	3.17399	3.28066		3.25275	0.18203		2.89401	1.69862	1.61967	2.49933	3.71271	2.12631	1.77336	1.68739	2.16231	1.10848	1.80626	1.56291	0.671379	1.15918	1.50439	2.58695	1.44614	0.806007	0.787767
		15	3.1978	4.34739	1.93956	2.32901	3.29859	2.54241	4.64417	2.56274	2.61872	4.89436	3.61219	2.39545	2.93959	4.19715	2.15542	2.75458	3.20562	3.78934	3.3454	3.42416	1.59112	5.43107	3.11925	3.11325		3.22702	0.194847		3.11025	1.6807	2.03802	2.18966	4.20908	1.91632	1.75124	1.65166	2.02505	0.979343	2.19578	1.40936	0.537279	1.19701	1.51744	2.54122	1.39062	0.950127	1.28557
		16	0.220024	0.61028	0.343819	0.558828	0.466627	0.844214	0.689233	2.04051	0.247151	0.70758	2.08455	0.247842	0.516458	0.882387	0.729247	0.401495	1.20957	1.05244	0.151451	0.730022	0.559425	0.235886	0.660871	2.5477		0.780734	0.127127		1.01222	0.83848	1.07804	0.219505	0.666918	0.06601	0.195116	0.262431	0.734165	0.238498	0.189906	0.191595	0.190618	0.223864	0.202369	0.153866	0.341567	0.0452641	0.179145
		17	0.0265987	0.598785	0.268518	0.0190456	0.344466	0.713227	0.99437	0.951738	0	0.379309	1.52434	0.00695038	0.995377	0.359702	0.965741	0.0639186	0.875644	1.25457	0.0175807	0.395643	0.00422813	0.227588	0.50002	1.46769		0.539794	0.0992592		0.776852	0.597974	0.699112	0.424429	0.391399	0.0889614	0.0700411	0.19703	0.246581	0.204508	0.351306	0.224456	0.24614	0.172498	0.232025	0.167853	0.240072	0.0665566	0.438108
	(light)	18	0.0509362	0.529904	0.536173	0.011701	0.200586	0.467713	1.00376	0.818193	0	0.0115255	1.51269	0.00091941	1.35528	0.633963	1.2594	0.0756336	0.139541	1.85113	0.0547758	0.37636	0.36657	0.811751	0.708456	1.44234		0.592471	0.113951		0.67333	0.916776	0.61299	0.666313	0.488146	0	0.0879051	0.188672	0.457583	0.413077	0.218594	0.305897	0.415762	0.405524	0.323356	0.189979	0.341731	0.028937	0.404378
		19	0.0171372	0.585063	0.233226	0.00765554	0.136383	0.594892	0.959098	0.76414	0	0.00642247	0.725586	0.00595207	2.11586	0.563588	1.88592	0.0987182	0.0286012	2.20325	0.0376823	0.207112	0.131671	1.63933	0.787704	1.58075		0.638156	0.148119		0.482563	0.686856	0.580305	0.617934	0.811867	0.0116801	0.158806	0.271318	0.573031	0.356483	0.331414	0.457605	0.308426	0.457403	0.326768	0.0898257	0.336621	0.0802628	0.51727
		20	0.0325138	0.995164	0.634756	0.00865358	0.116343	0.926895	1.29048	1.59063	0.00136298	1.27498	0.332189	0.00251367	1.8562	0.554458	1.93624	0.0503984	0.0292465	1.97966	0.00512804	0.345099	0.0157008	1.52862	1.17826	1.66013		0.764401	0.148664		0.572462	0.837307	0.683028	0.474104	1.02241	0.0126973	0.160797	0.206656	0.416395	0.439571	0.297048	0.458523	0.379095	0.283563	0.565189	0.0400911	0.407206	0.0200651	0.623724
Non-Tg, MG2!+
		1	1.41689	0.637468	2.26818	2.12093	2.31855	0.759969	2.67415	0.577315	3.86139	0.0479433	0.840431	0.391649	2.10627	1.26913	0.994721	2.10983	0.272292	0.131925	0.474362	0.0266799	3.04542	2.99434	1.52269	1.78916		1.44382	0.220349		0.106829	1.03117	0.403836	1.72433	0.429892	0.122908	0.597148	2.35613	1.1493	0.0827571	0.618405	0.345772	1.00554	0.86532	1.41459	0.00715108	1.47103	0.740835	0.85728
		2	1.31917	0.865903	2.07038	1.97171	2.29018	0.76395	2.67483	0.690435	3.8138	0.20962	0.741034	0.365814	1.55411	1.51499	1.11044	2.1735	0.131765	0.0894818	0.759465	0.0250258	1.81274	1.7339	1.99155	1.95388		1.35949	0.192175		0.0373311	1.27659	0.30276	1.75082	0.716767	0.286293	0.987395	2.22103	1.22124	0.0799439	0.55072	0.611491	1.43459	0.757442	1.48158	0.00182933	1.35958	0.78643	1.17473
		3	1.03661	0.800545	2.31453	1.34898	2.478	0.749867	2.71929	0.982539	2.69893	0.185374	1.31549	0.721757	1.38893	1.32376	1.2203	1.91604	0.475347	0.314095	0.461287	0.117217	2.83549	1.46772	2.57983	1.84091		1.3872	0.17535		0.0724773	1.42325	0.594294	2.01566	0.630409	0.263811	0.831402	2.30791	2.43292	0.116744	0.635606	0.391625	1.23084	0.888346	1.26742	0.00129975	1.49518	0.66498	1.24977
		4	0.023508	1.24839	2.34705	1.12221	2.71985	0.908719	2.66001	0.543871	2.35918	0.0716512	1.58348	1.09778	2.10939	1.20966	1.68192	1.86699	0.616514	0.287436	0.711947	0.0586465	1.39287	1.86476	2.73557	1.7497		1.3738	0.175863		0.169408	1.68736	0.726503	1.92446	0.506174	0.259737	0.600057	2.69561	2.44631	0.270864	0.798562	0.112905	1.70047	0.95505	1.15634	0.00515489	1.2394	0.78781	1.08121
		5	0.00226028	1.87717	2.21604	1.87551	2.49249	1.09604	2.9753	0.712286	2.67831	0.543247	1.30653	1.30598	1.73437	1.18654	1.88173	2.23019	0.963228	0.327911	1.14078	0.55871	2.76539	1.96837	4.00316	1.91235		1.65641	0.192907		0.267605	1.7733	0.598443	2.10444	0.601039	0.297159	0.648263	2.83208	1.55345	0.499255	0.738333	0.265477	1.78858	0.76682	1.15322	0.000570499	1.50809	0.691093	0.812808
		6	3.22977	3.08792	3.62883	4.30196	4.37503	2.47675	4.56819	3.94498	4.41464	2.06471	3.55267	4.40229	3.85026	5.24538	2.77731	3.93089	2.85063	2.78743	3.83571	2.94264	5.44789	3.03159	3.87572	5.40368		3.75112	0.186807		1.65205	2.84375	3.17577	3.6494	3.11468	2.31635	2.83243	3.7697	2.13281	1.60132	2.98847	2.3006	3.45545	1.93101	2.47455	2.22289	4.22078	2.23909	2.74725
		7	2.69717	2.3039	3.80267	4.0868	4.31613	2.50263	4.32691	3.8824	4.12181	2.59	3.89052	3.6255	3.41101	5.02589	2.4768	3.98011	2.56132	2.66145	3.50145	3.81452	5.51854	2.9528	4.02495	4.73406		3.61706	0.178182		2.14389	2.7086	3.48779	3.06735	3.34696	3.22283	2.93913	3.34795	1.79465	2.07	2.42779	2.00927	2.72627	1.46428	2.38366	2.06167	3.07238	2.00922	2.21199
		8	2.67077	2.90214	3.79144	3.92181	4.68653	2.65991	4.4348	4.47628	3.9249	2.59707	4.11256	3.44443	3.26431	4.48806	2.28994	4.47432	2.38527	2.55253	3.19388	3.88995	5.37433	3.33936	4.15634	4.56637		3.64989	0.175603		2.44966	2.6917	3.42194	3.05321	3.66643	3.81537	3.08744	3.01081	1.66881	2.29381	2.47625	1.92922	2.77946	1.45446	2.27485	2.0173	2.78374	2.56362	2.15188
		9	2.88052	2.92375	3.37804	4.07659	5.25602	2.51265	4.27826	4.70095	4.04979	2.7323	4.30426	3.01085	2.63839	4.53035	2.68308	4.63695	2.19814	2.61902	3.26453	3.86541	5.06935	3.8237	4.24956	3.95635		3.65162	0.181366		2.57432	2.95513	3.55524	2.80892	3.91407	3.61761	2.62463	3.27878	1.77549	2.08636	2.43707	1.95648	2.65438	1.30661	2.59789	1.72904	2.64368	2.41623	2.26766
		10	2.7742	2.83799	2.83852	3.87538	5.13347	2.67481	3.99991	3.84358	4.07448	3.19814	4.52456	3.29407	2.18563	4.4951	2.61888	4.28889	2.07444	2.76015	3.2098	3.89029	4.7066	3.81097	4.14178	3.42419		3.52816	0.168421		2.14293	2.54637	3.14141	2.60986	3.50332	4.08049	2.40816	2.76351	1.64918	0.912971	1.73001	1.79148	2.50598	0.895412	2.29871	1.86494	2.82471	2.56546	2.41149
		11	2.88341	2.95396	2.73969	3.89919	4.84517	2.56131	3.40098	3.16703	4.34594	2.87479	4.3592	3.26698	1.97644	4.45542	2.373	4.42491	1.90873	2.75573	3.18226	3.70109	5.22867	2.78412	4.1129	2.55497		3.36483	0.185743		2.09731	2.26147	3.30236	2.56489	3.25274	3.56325	2.66681	3.63771	1.57518	1.31599	1.84805	2.12711	2.33417	0.882719	2.2725	2.13294	2.70931	2.44968	2.34037
		12	2.85256	3.02395	2.73571	3.7908	4.52479	2.66884	4.07996	2.6757	4.16128	2.78616	4.51436	3.01189	2.25665	3.99919	2.54898	4.67343	1.60171	2.52711	2.80974	3.59568	4.86228	3.26741	4.38228	2.56406		3.32977	0.18191		2.18953	1.99309	2.89803	2.45258	3.87145	4.04586	2.41178	2.85709	1.1244	1.99548	1.69802	2.01891	2.07115	1.0756	2.08713	2.04313	2.67068	2.17694	2.31408
		13	2.87993	2.81824	2.54865	3.92748	5.36204	2.36415	3.62647	1.73367	4.02273	2.96312	4.26132	2.6736	1.87323	4.15167	2.31358	4.07207	1.54057	2.56566	3.02686	3.64377	4.78487	3.3328	3.79898	1.5381		3.15932	0.209593		2.20092	1.7229	3.55228	2.3762	3.96287	4.34663	1.90464	2.99878	1.64942	0.934091	1.51207	2.037	2.06379	0.827936	2.19499	2.00917	2.35863	2.27547	2.1741
		14	2.61394	2.63944	2.78131	3.59973	4.80164	2.49034	3.77611	1.68133	4.0165	3.19331	4.57937	2.30917	2.00649	3.52552	2.35725	4.1549	1.86003	2.57662	2.86962	3.50208	5.2373	3.19427	3.90133	1.70476		3.14051	0.201413		2.17455	1.78138	2.98202	2.49749	3.57366	2.94737	2.11117	3.20365	1.49751	1.60298	1.71968	1.77621	1.85746	0.758163	2.29232	1.99149	2.52129	2.19521	2.1116
		15	2.48713	2.45985	2.646	3.63073	4.702	2.31817	3.69197	2.42518	4.14992	2.80782	3.96827	2.72316	1.57967	3.73376	2.45077	4.04624	1.43297	2.32805	2.7003	3.44637	5.22906	3.23816	3.74511	0.629239		3.02374	0.216854		2.0844	1.72303	2.7975	2.2691	3.46098	3.69745	2.36145	2.31294	1.53927	1.4428	1.91101	2.01964	1.63987	0.541127	2.19332	1.76332	2.38781	2.50263	2.07932
		16	0.407297	0.4206	0.962435	1.77133	1.49761	0.44624	1.593	0.421052	2.95056	0.458498	0.623409	0.154425	1.09714	0.873097	1.22293	0.93778	0.170078	0.282082	0.100806	0.350216	3.2735	2.40426	1.00435	1.50781		1.03877	0.177318		0.384916	0.920175	0.990665	1.04571	0.662009	0.826618	0.901192	1.01631	0.756181	0.327953	0.296302	0.2485	0.802369	0.113214	1.20381	0.211369	1.84789	1.84583	0.636173
		17	0.00683006	0.576177	1.32415	1.17705	2.01195	0.558616	1.76586	0.430294	4.06784	0.158075	0.42747	0.00478388	1.56626	0.878413	1.22155	1.41387	0.497872	0.0977512	0.0940554	0.0838129	4.03289	2.66901	0.839797	1.63769		1.14759	0.233308		0.412825	0.621225	0.609921	1.36024	0.507435	0.0160369	0.850975	0.940256	0.307709	0.327927	0.326879	0.066171	0.802448	0.30531	1.13172	0	1.51737	1.10926	0.701493
		18	0.00849384	0.546481	1.60192	1.20743	2.20407	0.553818	2.23367	0.193283	4.06594	0.281981	0.559459	0.0720832	1.50742	0.875986	0.624918	1.59389	0.320608	0.102455	0.387166	0.0346689	2.5288	3.50961	0.630526	1.74132		1.14108	0.227506		0.411486	0.993436	0.214005	1.56576	0.51495	0.0255368	0.642626	1.2211	0.660452	0.0840242	0.213633	0.118331	0.911521	0.268048	1.31564	0.0034775	1.58097	0.926895	0.745176
		19	0.416289	0.706046	1.84294	1.51909	2.33562	0.601054	2.20321	0.257639	3.8629	0.285176	0.485424	0.235757	1.80723	1.02969	1.29693	1.73913	0.400112	0.16985	0.374632	0.0116401	3.72239	3.71824	1.23325	1.68518		1.33081	0.238149		0.333414	1.19268	0.0284642	1.57209	0.707211	0.160873	0.741704	1.61414	0.848546	0.0848319	0.362105	0.25332	0.877425	0.312985	1.28367	0.00619185	1.65501	0.568809	0.811609
		20	1.44921	0.475421	2.46981	1.46451	2.46449	0.688569	2.2615	0.500074	3.60975	0.227712	0.523936	0.423343	1.99122	1.1056	1.01978	2.11403	0.340057	0.142103	0.517731	0.0688358	3.95964	2.86556	1.75736	1.97357		1.43391	0.227826		0.143274	0.956429	0.337238	1.71647	0.660593	0.199115	0.638511	2.13616	0.728809	0.0422526	0.456665	0.212041	1.12846	0.346249	1.30095	0.00962409	1.68997	0.796467	0.884049
NeuMitoFAP, no chemical
		1	1.06898	1.46327	2.4421	2.21614	1.73167	2.30228	2.102	0.627434	2.66372	1.97142	0.654416	2.48857	1.56906	1.42725	1.38773	2.02416	0.940175	0.580073	0.847169	2.50583	1.27596	1.5745	2.6665	2.37938		1.70457	0.139602		0.00326298	0.038266	0.0131627	0.789816	0.681459	0.708564	0.459217	1.61521	1.02543	1.07931	2.84841	0.0652009	0.49346	0.359059	0.4668	0.13381	1.11893	0.372154	0.183027
		2	1.20556	1.60119	2.94049	2.51319	1.91031	2.40439	2.09428	1.02942	2.76668	1.63687	0.868192	2.72749	1.69275	0.834975	1.47228	2.163	1.43352	0.554997	0.816559	2.32927	1.4311	1.3741	3.25383	2.56195		1.81735	0.153861		0.680331	0.00699625	0.00507695	0.810498	0.869653	0.644345	0.577029	1.88193	1.50462	0.975431	2.76625	0.0517126	0.692915	0.399188	0.599869	0.152123	1.06893	0.352223	0.298114
		3	1.19092	1.87907	3.51211	2.54795	2.133	2.62929	2.10597	0.802863	2.50866	1.79648	0.850945	3.00617	1.97882	1.03758	1.36537	2.17588	1.55152	0.601524	0.761531	2.36952	1.37581	1.57739	2.82474	2.43047		1.87557	0.159236		0.629605	0.0109532	0.0232568	1.66141	0.857587	0.71961	1.43043	1.47111	1.60782	1.11413	2.84923	0.0717385	0.780111	0.666051	0.442156	0.387305	1.06775	0.319141	0.166207
		4	1.48447	1.81915	3.14565	2.47746	2.10542	2.66336	2.20575	1.18476	2.59239	2.07665	0.955932	2.83561	2.14034	0.96185	1.67066	1.88485	1.52933	0.760481	0.946666	2.0456	1.70788	1.89983	2.85303	2.24987		1.92487	0.134467		0.337799	0.00232247	0.00894359	1.688	1.0966	0.642632	1.21229	2.06327	1.92877	0.94745	2.78722	0.0458492	0.983181	0.24765	0.574796	0.537291	0.828742	0.483056	0.226513
		5	1.50617	1.65582	3.3916	2.78679	2.35345	2.71544	2.38025	0.7923	2.88235	2.15129	1.35233	2.67551	2.54342	2.0073	2.10406	2.11971	1.64225	0.769709	1.35779	2.05564	1.71744	2.03941	2.79316	2.48268		2.09483	0.134194		0.847316	0.149419	0.00558286	1.40855	0.855269	0.596122	0.0414428	1.61929	1.98053	1.03916	3.06662	0.0623237	1.02577	0.434615	0.331935	0.524442	1.20881	0.378529	0.169549
		6	2.48375	3.32164	4.84378	3.90496	2.61948	3.52108	3.18157	3.24988	4.03188	4.34291	3.50757	4.52745	3.20602	3.11044	4.12265	3.86884	3.6955	3.57715	1.86258	3.14088	2.4183	3.11098	3.84768	3.82009		3.47154	0.142218		2.48821	2.98821	0.872498	3.219	3.06164	2.65138	3.82483	3.18038	3.54458	2.5815	3.77983	1.98543	1.97406	2.19698	1.8262	2.58371	3.12872	2.48531	2.04038
		7	2.13387	3.55071	4.39218	3.74999	2.09518	3.31886	3.15959	2.81946	3.40904	3.87575	3.6018	4.18799	2.52296	2.60814	3.07214	3.855	3.72967	3.41004	1.9097	2.00371	2.44718	3.01157	4.12083	3.08804		3.16973	0.148165		3.01115	3.43732	1.4778	3.20172	2.59069	2.77941	3.44002	2.57103	3.38434	2.80199	3.9016	2.35805	1.95363	2.16965	2.13072	2.82577	3.13977	2.86336	1.91519
		8	1.83973	3.04864	4.11621	3.24612	2.10214	3.16525	3.11755	2.8287	3.1068	3.67151	3.25983	3.85026	2.64722	2.69237	3.17179	3.77296	3.31354	3.65937	1.73958	1.81137	2.1339	3.22812	3.68683	2.8941		3.00433	0.137589		2.77941	4.29922	2.09839	3.79813	2.83577	2.67057	3.29658	2.64852	3.83692	2.88738	3.73037	2.33912	1.88671	2.2034	2.19807	4.08205	3.60769	2.92589	2.02656
		9	1.87138	3.02681	3.98398	2.92686	1.8428	2.94744	3.02749	2.99522	3.03867	3.52308	3.53217	3.40316	2.34595	2.96275	3.2604	3.4627	3.06781	3.82812	1.69071	1.89454	1.60953	3.15396	3.75021	2.34485		2.89544	0.143305		3.04458	4.56702	2.46409	3.86685	2.85332	2.55256	3.66712	3.61893	3.94602	3.0843	3.78191	2.47057	2.06137	2.28206	2.14986	4.071	3.23443	2.93893	2.14858
		10	1.78304	2.65334	3.58289	2.75695	1.71364	2.9371	2.69125	2.67188	2.87137	3.05199	3.43284	3.44366	2.49184	2.98993	2.84727	3.27094	2.98778	3.57261	2.02185	1.69266	1.63364	3.19084	2.96394	2.20636		2.72748	0.123111		3.50878	4.02988	2.41258	3.78274	2.87324	2.58927	3.30634	3.20151	3.9253	3.03562	3.58585	2.33878	1.90981	2.55127	2.19711	3.91709	3.67703	2.82839	1.9859
		11	1.57269	2.5775	3.80615	2.60899	1.71063	2.63065	2.38835	2.69769	2.79652	3.21444	3.67385	3.67059	1.93983	2.95079	2.7415	2.92038	3.17839	2.92062	1.74716	2.00843	1.46169	3.06305	2.94396	2.33731		2.64838	0.133988		3.47518	4.07696	2.72125	3.53549	2.89104	2.67647	3.60027	2.8644	4.08631	3.07031	3.78174	2.51571	1.80495	2.5392	2.03864	3.84168	3.47954	2.86652	1.88197
		12	1.77392	2.25938	3.24466	2.65093	1.85921	1.81909	2.33874	2.50505	2.5889	3.33422	3.31795	3.23715	1.92297	3.38377	2.74957	3.32321	3.20504	3.62357	1.30712	1.54749	1.63931	2.66521	3.17248	2.38408		2.57721	0.141251		3.45433	3.82851	2.56781	3.28776	2.96169	2.86343	3.35489	3.62899	4.60832	3.15689	3.55744	2.42503	1.8362	2.46355	1.70665	4.24399	3.49622	3.01226	1.88959
		13	1.62199	2.14091	3.41732	2.42612	1.4589	2.06548	2.21734	2.34893	2.49296	3.22179	3.25046	3.25029	2.22328	2.74128	2.30166	3.04796	3.01911	3.17775	0.836058	1.62372	1.26404	2.5098	2.67541	2.17766		2.39626	0.140607		2.9811	3.91665	2.50147	3.46838	2.90359	2.83372	3.04102	3.73131	4.2215	3.26594	4.16446	2.16423	1.71056	2.44903	1.06876	3.57532	3.32707	2.81262	1.88173
		14	1.48123	2.07537	3.25873	2.43917	1.57598	1.72694	2.05789	2.33766	2.75883	2.84598	3.26085	2.59485	1.78918	2.52227	2.53123	3.14228	2.74338	3.11539	1.23343	1.8442	0.908235	2.2054	3.09265	2.16723		2.32118	0.134272		3.24699	3.25341	2.86426	3.11705	2.84358	3.21544	2.50844	3.62935	4.00486	3.01118	3.68544	2.18146	1.51503	2.21757	1.27501	4.34571	3.4798	2.78689	1.99801
		15	1.30373	1.51848	3.61344	1.76309	1.71552	2.03798	1.72273	2.21267	2.49342	3.10695	3.06075	2.35321	1.48658	2.84792	2.33419	3.00177	2.58032	2.90489	1.07981	1.43249	1.05156	2.38683	3.46812	2.2255		2.23758	0.151216		3.27383	3.80157	2.55284	3.0059	2.51757	2.74027	2.56664	3.81481	4.22331	3.26744	3.20962	1.94049	1.28537	2.05188	0.914345	4.31383	2.93843	2.58998	1.77437
		16	0.0873636	1.08934	0.743291	0.773111	0.668059	0.709099	0.508798	0.58797	1.07874	0.846861	0.209306	1.24298	0.467206	1.35795	0.318314	1.77929	0.85196	0.390209	0.458572	1.06175	0.225713	1.01746	0.893303	1.56319		0.788743	0.0883626		0.655453	0.362307	0.413067	0.632869	0.792544	2.0177	4.25235	4.14786	1.31558	1.5904	1.56694	0.129326	0.156099	0.324737	0.534282	1.19565	0.981032	0.64782	0.337765
		17	0.519306	1.39676	0.894303	1.14411	1.18315	1.07911	1.25568	0.286686	1.92601	1.12145	0.0296186	1.53992	0.814436	0.406345	0.160681	1.92967	0.282492	0.431555	0.284027	1.38321	0.428513	1.20606	1.53245	1.84455		0.96167	0.119808		0.0161344	0.194498	0.279215	0.463912	0.960203	0.632554	2.09486	3.9777	0.973062	1.1606	2.60049	0.0348589	0.285191	0.371126	0.567342	0.405816	1.14888	0.336185	0.104707
		18	1.02104	1.54336	1.60131	1.65396	1.407	1.65547	1.67528	0.253279	1.74342	1.44433	0.100974	1.58188	0.787957	0.041868	0.28099	1.90915	0.254283	0.377202	0.370818	1.97441	0.730384	1.14664	1.80881	1.99135		1.1398	0.137582		0.00118898	0.0362157	0.0464462	0.587426	0.782375	0.61645	0.931623	2.26313	0.82515	0.951426	2.62964	0.0260764	0.404216	0.327881	0.46535	0.163967	0.891422	0.296772	0.0114439
		19	1.00151	1.57383	2.55854	1.85243	1.42234	1.9659	1.81272	0.614384	2.26103	1.83468	0.303521	1.89145	1.08206	0.0768271	0.695266	1.99798	0.374853	0.498583	0.287835	2.07494	0.734693	1.26185	1.79741	2.07553		1.33542	0.150219		0.0981606	0.0167766	0.0107143	0.566703	0.821947	0.616186	0.937979	2.9738	0.818172	0.759611	2.47745	0.039569	0.434789	0.347013	0.708872	0.0466729	1.02972	0.107571	0.0181368
		20	0.841919	1.64748	2.5865	2.35561	1.84927	1.85649	2.17282	0.83945	2.73576	1.85032	0.456357	2.0346	0.950109	1.80769	1.59748	2.10841	0.479041	0.612528	0.70904	2.49816	0.996215	1.23083	2.51452	2.43861		1.63205	0.150944		0	0.00402063	0.00654954	0.654383	0.651043	0.658362	0.883102	2.53733	0.755852	1.06431	2.60186	0.0632816	0.553012	0.646056	0.744306	0.0808174	0.954447	0.233458	0.132469
NeuMitoFAP, MG2I
		1	0.436879	1.34333	2.21975	2.5317	1.14429	2.7333	1.87711	1.6448	0.0107203	0.229291	1.85155	2.1301	2.37347	0.00407433	2.97017	2.89648	1.15953	1.94841	1.00261	1.15527	0.98573	0.210448	0.0915992	0.00080721		1.37298	0.20175		0.000650324	0.267821	0.231475	0.543226	0.182676	1.1362	0.100299	0.030277	0.457782	0	0.634744	0.105411	0.491395	0	0.0637396	0.205571	0.106178	0.0035587	0.453194
		2	0.250358	2.05881	2.44799	2.55011	1.02969	2.54691	2.13982	1.79898	0.86499	0.336946	1.91824	2.42029	2.62059	0.00352014	3.32297	3.02795	1.61727	1.72685	0.841042	0.980382	0.870112	0.188221	0.228559	0.00479635		1.49148	0.21007		0.00115655	0.294487	0.227251	0.363507	0.233791	1.17312	0.260805	0.0626833	0.396753	0	0.315225	0.13022	0.227433	0	0.100272	0.246173	0.0722563	0.00282543	0.345526
		3	0.251192	2.39026	2.38879	2.56146	1.52334	2.59382	1.88627	2.03872	0.674311	0.435746	1.73237	2.82929	2.42024	0.00208309	3.33064	3.15463	1.6985	1.82668	1.23029	2.06274	1.09072	0.175468	0.2112	0.00862703		1.60489	0.211956		0	0.23718	0.215981	0.4237	0.156245	1.11037	0.161955	0.0297923	0.546036	0	0.33901	0.151215	0.296234	0	0.0745351	0.225716	0.098491	0	0.595517
		4	0.314141	2.57017	2.65566	2.90424	1.39335	2.31094	2.09416	1.97738	0.604164	0.519359	1.67837	2.96829	1.785	0.0044629	2.79498	3.14681	1.57705	1.77272	1.26098	1.81757	1.31072	0.109554	0.0472558	0.081636		1.57079	0.208414		0.000580842	0.280379	0.211944	0.538641	0.240334	1.25153	0.180453	0.0432955	0.465441	0	0.295115	0.15711	0.341958	0	0.0952927	0.24238	0.106516	0.00112186	0.530661
		5	0.39214	2.23424	2.4524	2.77284	1.55067	2.45496	2.28034	1.94474	1.66399	1.08299	1.94147	2.84621	2.3621	0.00224193	3.22062	2.64185	1.50909	1.93695	1.63167	2.61411	1.57777	0.389722	0.148506	0.571507		1.7593	0.186681		0.00116469	0.220451	0.461184	0.41357	0.40598	1.19696	0.178968	0.086388	0.767049	0.00056709	0.249115	0.227851	0.44303	0	0.0394871	0.311655	0.0935979	0.000541805	0.607737
		6	3.24881	3.13011	4.31307	4.03623	3.01825	3.15577	2.14369	2.19722	4.15416	3.14761	3.42709	3.93328	2.79862	0.81721	2.95879	5.31964	1.84342	3.51039	3.11801	3.96128	2.68078	1.64451	2.23996	1.48915		3.01196	0.209409		0	0.365355	0.460417	0.473063	0.565491	1.09148	0.149171	0.128206	0.600976	0	0.407427	0.231935	0.292348	0	0.185901	0.335223	0.161653	0.00256809	0.713087
		7	2.49797	3.05431	3.53659	3.37399	3.24973	2.35342	2.0778	1.79522	4.66184	3.06797	2.23468	4.22892	2.2383	2.21564	2.87166	4.73832	1.96482	2.94032	2.52549	4.03678	2.5913	2.02956	1.8602	2.3359		2.85336	0.176875		0	0.452617	0.339713	0.58903	0.175064	1.22612	0.0453252	0.182925	0.579281	0	0.427597	0.22333	0.378598	0	0.130405	0.458746	0.0768982	0.00670528	0.273665
		8	3.53339	3.18048	3.14377	2.87676	3.20496	1.83335	1.84416	1.7108	4.3829	3.53789	1.55472	4.3723	2.29614	2.7507	2.94304	3.98925	1.86076	3.12757	2.27306	3.94232	2.62346	1.93884	1.73987	2.33186		2.79135	0.177824		0	0.48304	0.403834	0.674861	0.210435	1.477	0.0234392	0.129759	0.853441	0	0.809601	0.149437	0.343352	0	0.242769	0.478779	0.139844	0.00176605	0.312185
		9	3.13635	2.94136	2.94913	3.32166	3.18001	1.88701	2.18668	1.76863	5.80922	4.23508	1.63707	3.93902	2.33466	2.69352	2.97829	3.92531	2.20905	3.25903	1.86399	3.70794	2.73789	1.65469	1.84344	3.63766		2.90986	0.204297		0.000533406	0.388158	0.509849	0.526488	0.473715	1.40751	0.0733616	0.0989018	0.531623	0	0.632148	0.212911	0.284262	0	0.178017	0.515791	0.115855	0.0044109	0.298688
		10	2.55348	3.28998	2.59895	3.46091	2.71555	1.96647	2.10274	1.86629	5.73075	4.36022	1.75934	4.14506	1.75979	2.68343	2.653	3.21798	2.11386	3.52203	1.5217	3.71795	2.97893	1.5784	1.77297	3.00817		2.79491	0.209105		0	0.481178	0.447906	0.674427	0.512275	1.15761	0.126585	0.157129	0.652785	0	0.426704	0.292471	0.280707	0	0.105354	0.427169	0.0849894	0.00451482	0.26804
		11	3.09924	2.98631	1.83946	3.29518	3.02985	1.86595	1.88978	1.67723	4.90699	3.71521	1.64871	4.06457	1.74537	2.82764	2.88937	3.57829	2.36252	3.47233	1.06213	3.82475	2.06136	1.65618	1.76339	2.7137		2.66565	0.197132		0	0.331628	0.448129	0.689606	0.00236294	1.46931	0.0161745	0.0431411	0.556122	0	0.715052	0.100634	0.258623	0	0.144198	0.50481	0.113712	0	0.44235
		12	3.01176	2.95766	1.84367	3.36544	2.99033	1.7435	1.79473	1.34363	5.49633	4.07716	1.70521	3.804	1.74191	2.89308	2.86597	3.597	1.91164	3.2542	1.06513	3.53549	2.32157	1.33024	1.6135	2.668		2.62213	0.217299		0.000547227	0.34399	0.358313	0.692371	0.19005	1.66783	0.145344	0.0213772	0.488599	0	0.626264	0.221207	0.46625	0	0.140665	0.309404	0.0533249	0	0.256448
		13	2.42272	2.96132	1.92715	3.4373	2.64978	2.01441	1.82124	1.68916	4.94169	3.723	1.7979	3.88206	1.74967	2.62392	2.37882	3.19266	1.5745	3.15986	0.508379	2.97329	2.25497	1.29173	1.63159	3.4536		2.50253	0.201449		0	0.318128	0.385226	0.440923	0.100055	1.39894	0.247984	0.105218	0.589521	0	0.649452	0.171726	0.326515	0	0.138698	0.411994	0.0475129	0	0.525296
		14	1.07029	2.62678	1.92728	2.7761	2.9661	1.95399	1.67103	1.33002	4.88055	3.96427	1.54494	3.55241	1.62843	2.60414	2.26615	3.22637	1.52618	3.00769	0.759308	3.06933	2.34853	1.05147	1.79425	2.87317		2.35078	0.204141		0.00112944	0.331501	0.392186	0.3072	0.0550192	1.08053	0.191517	0.117084	0.64683	0	0.527354	0.125372	0.340228	0	0.143048	0.391666	0.0754456	0.00166822	0.546091
		15	1.81961	2.86959	1.82851	3.20797	2.64282	1.60006	1.92845	1.60701	3.53207	3.5013	1.35659	3.64033	1.38151	2.57474	2.12211	2.9895	1.39015	2.89091	0.561097	3.18011	2.3457	0.924842	1.63205	2.2349		2.24008	0.176182		0	0.412534	0.27587	0.307141	0.130156	1.1974	0.0581508	0.0504251	0.517806	0	0.348657	0.129442	0.282305	0	0.0930624	0.311964	0.115465	0.00125525	0.327731
		16	0.207596	0.463902	0.202009	1.74878	0.395747	0.541704	0.99365	0.140232	0.488931	0.587828	1.15088	0.61203	0.905352	0.134352	0.810037	1.95776	0.414821	1.07796	0.149865	0.380207	1.04221	0.0586518	0.11186	0.0524646		0.609534	0.105243		0.00180634	0.353168	0.290253	0.144889	0.152819	1.41172	0.107268	0.082105	0.48026	0	0.33275	0.148399	0.211186	0	0.0738519	0.160806	0.119576	0.00525362	0.327087
		17	0.301437	0.341595	0.604065	2.36993	0.353172	1.61997	0.974069	0.302256	0.00682742	0.00061999	1.15806	0.637933	1.63137	0.255061	1.01108	1.4686	0.129966	1.74788	0.202943	0.0266642	0.823889	0.0899137	0.0292144	0.000543838		0.670294	0.138903		0	0.329191	0.187657	0.276399	0.263303	1.26384	0.0941692	0.11876	0.508182	0	0.360152	0.231689	0.219006	0.000554959	0.127804	0.242498	0.131653	0.00248768	0.241444
		18	0.49897	0.628789	1.29605	2.33334	0.617241	2.4347	1.13061	0.643989	0.00934869	0.233546	1.36862	1.26906	1.93043	0.0204054	1.72496	1.99378	0.346056	1.76683	0.46935	0.0314103	1.27007	0.0460043	0.0249632	0.00135031		0.920411	0.163371		0	0.307735	0.213486	0.420559	0.0861152	0.8885	0.0731958	0.0561792	0.582029	0	0.466338	0.184586	0.418932	0	0.127215	0.202756	0.138134	0.00233291	0.428139
		19	0.199529	0.950889	1.741	2.69652	0.378193	2.44095	1.20578	0.925629	0.0201685	0.27957	1.78391	1.87769	2.26297	0.00926089	2.44683	2.257	0.626352	1.75754	0.792103	0.515838	1.37179	0.0973266	0.155163	0.0037768		1.11649	0.185624		0.00172059	0.309688	0.260301	0.573292	0.457816	1.177	0.0656702	0.0680604	0.539659	0	0.609977	0.106268	0.4584	0	0.0417082	0.273602	0.176948	0.00171163	0.397332
		20	0.131948	1.28153	1.93428	2.82949	0.427794	2.55014	1.5866	1.44118	0.00703134	0.248039	2.17722	2.22732	2.29479	0.00785508	2.35659	2.74592	0.909815	1.67272	0.775803	0.618972	1.46365	0.196281	0.139767	0.00339169		1.25117	0.199869		0.000568919	0.320805	0.213315	0.568496	0.147871	1.17529	0.299812	0.116959	0.331412	0.00226076	0.647687	0.133205	0.521373	0	0.0832743	0.350372	0.130458	0.00284085	0.48909
[truncated: 7 more columns]
