# Supplementary material for: Chemoptogenetic ablation of neuronal mitochondria in vivo with spatiotemporal precision and controllable severity
Source: eLife. 2020 Mar 17;9:e51845. doi: 10.7554/eLife.51845 (PMC7077989; doi:10.7554/eLife.51845)
Supplement: Figure 2—source data 2. [file elife-51845-fig2-data2.xlsx]

## Sheet: Figure 2E
Heart Rate (beats/min)
			Non-Tg		Non-Tg		NeuMitoFAP		NeuMitoFAP
			No chemical		MG2I		No chemical		MG2I
		60J/cm2 @ 660nm	pre	post	pre	post	pre	post	pre	post
	individual larvae		147.699	145.601	139.68	145.77	137.514	150.901	142.1	125.406
			154.428	140.96	130.719	144.299	138.533	129.285	150.598	127.47
			158.438	137.326	163.987	144.448	127.35	135.656	155.181	137.63
			153.204	122.032	157.317	138.159	132.074	143.558	150.313	149.321
			146.381	136.903	152.132	135.85	119.573	140.512	136.344	149.791
			130.432	151.017	141.419	149.274	124.167	137.514	152.006	152.102
			127.256	139.826	143.379	148.963	128.359	142.841	135.356	139.403
			148.97	153.903	138.517	142.018	131.076	146.355	137.971	145.143
			134.326	144.996	152.535	157.565	135.693	147.825	144.696	141.605
			139.795	151.341	169.535	158.766	136.775	137.122	133.019	126.192
			146.326	132.638	156.412	168.071	128.242	148.895	142.341	135.35
			129.631	138.411	164.029	131.386	151.177	136.162	143.251	130.682
			129.79	142.78	133.586	141.953	144.772	144.107	136.282	116.921
			156.569	130.435	142.408	141.519	139.095	133.562	122.873	137.952
			147.225	130.711	149.096	145.507	141.851	123.702	146.16	148.21
			133.249	127.975	152.727	139.837	146.314	126.549	143.345	139.13
			136.191	145.099	145.632	136.958	142.373	143.59	137.937	145.141
			145.41	152.254	123.603	142.864	154.073	127.423	141.971	140.348
			139.152	140.18	142.129	134.341	147.76	142.568	142.379	134.388
			140.162	110.484	141.845	134.521	152.831	144.314	141.689	148.148
			147.621	162.118	149.748	138.849	134.373	142.717	142.686	147.824
			125.177	132.533	139.482	136.747	158.024	162.435	127.763	145.418
			133.824	127.104	149.453	146.204	155.147	141.038	129.692	142.172
			132.767	126.348	140.758	142.959	137.177	125.638	131.342	127.611
		Mean	141.001	138.457	146.672	143.618	139.347	139.761	140.304	138.89
		SE	1.99727	2.37551	2.2188	1.72706	2.12196	1.8559	1.61094	1.89487
