# Supplementary material for: Chemoptogenetic ablation of neuronal mitochondria in vivo with spatiotemporal precision and controllable severity
Source: eLife. 2020 Mar 17;9:e51845. doi: 10.7554/eLife.51845 (PMC7077989; doi:10.7554/eLife.51845)
Supplement: Figure 3—source data 1. [file elife-51845-fig3-data1.xlsx]

## Sheet: Figure 3
Membrane potential (mV)
											660nm light ON
	Time (min)
	1	2	3	4	5	6	7	8	9	10	11	12	13	14	15	16	17	18	19	20	21	22	23	24	25	26	27	28	29	30	31	32	33	34	35	36	37	38	39	40
Non-Tg + MG2I	-56.0137	-58.0433	-59.7441	-60.8578	-61.7108	-62.2896	-62.5065	-62.78	-62.9387	-62.9375	-62.9443	-62.8825	-62.7601	-62.6668	-62.3023	-62.0081	-61.9207	-61.6224	-61.3958	-61.1808	-61.0199	-60.9452	-60.9011	-60.7942	-60.5698	-60.3114	-60.2851	-60.0601	-59.861	-59.6552
	-62.6608	-64.1801	-64.4593	-64.8975	-65.3009	-65.8656	-66.1043	-66.6373	-66.7691	-66.7361	-66.5191	-65.782	-65.4244	-64.64	-64.61	-64.4629	-63.3154	-62.8433	-61.0659	-58.3967	-57.0984	-56.8937	-55.9518	-54.0948	-52.8314	-53.4229	-53.9059	-52.7895	-53.7421	-53.2545	-52.3682	-52.9468	-51.777	-51.4548	-50.305
	-60.8296	-61.3236	-62.4261	-62.5743	-63.2047	-63.6315	-63.4394	-64.0243	-62.8824	-63.3715	-63.2554	-62.7342	-62.838	-63.3057	-63.1751	-62.7197	-61.6351	-62.1393	-62.1368	-62.2074	-61.8016	-62.0153	-62.6237	-62.3547	-62.4345	-62.8081	-62.7042	-63.093	-63.8756	-63.9978
	-66.5877	-67.1609	-67.7317	-68.0511	-68.2552	-68.6548	-69.0369	-69.242	-69.377	-69.3957	-69.3251	-69.2483	-69.2788	-68.9515	-67.788	-67.0904	-66.36	-65.4389	-64.9931	-64.679	-64.2987	-64.4364	-64.1082	-64.0864	-64.2147	-64.0771	-63.8993	-63.8954	-63.8216	-63.3254
	-68.1103	-68.3318	-68.2292	-68.6176	-69.0342	-69.2453	-69.5694	-69.7034	-70.0866	-70.3477	-70.6611	-70.8602	-70.916	-70.8338	-70.9936	-70.9556	-70.9239	-70.7624	-70.6303	-70.5506	-70.5147	-70.4379	-70.447	-70.2855	-70.06	-69.5837	-69.3669	-69.6153	-69.5222	-69.2042
	-62.0994	-62.1083	-62.719	-62.6003	-63.2048	-63.5257	-63.2352	-62.8072	-62.5781	-62.5105	-61.9503	-62.2235	-61.3289	-61.0439	-60.7902	-60.8087	-60.2861	-60.3729	-59.8671	-59.5325	-58.8811	-60.0236	-59.0095	-59.2574	-58.8213	-58.442	-58.1203	-58.2325	-57.3747	-57.8153
	-59.2863	-59.6585	-60.4258	-60.202	-60.0954	-58.8657	-58.5867	-58.5272	-58.9557	-59.1037	-59.4352	-59.4625	-59.6341	-60.2488	-60.0056	-59.736	-59.7853	-59.6541	-59.5961	-58.6672	-58.372	-58.6832	-58.7626	-58.8625	-58.6341	-57.5452	-57.8119	-57.6128	-57.6014	-57.3145
	-65.4476	-65.6735	-66.1678	-66.2098	-66.6328	-66.139	-66.5649	-66.672	-66.7656	-66.6769	-66.7925	-66.5856	-66.3808	-66.05	-66.034	-65.4846	-65.0442	-64.7467	-63.9354	-63.4979	-62.9662	-62.7428	-62.6258	-62.9394	-62.4017	-62.692	-62.5966	-61.8615	-62.2423	-61.6355	-61.8704	-61.4152	-61.9887	-61.5719	-60.0975	-60.5684	-60.883	-60.7576	-60.25
Mean	-62.6294	-63.31	-63.9879	-64.2513	-64.6799	-64.7771	-64.8804	-65.0492	-65.0442	-65.135	-65.1104	-64.9723	-64.8201	-64.7176	-64.4623	-64.1583	-63.6588	-63.4475	-62.9526	-62.339	-61.8691	-62.0223	-61.8037	-61.5844	-61.2459	-61.1103	-61.0863	-60.895	-61.0051	-60.7753
SE	1.41494	1.28766	1.13174	1.12764	1.11905	1.21046	1.29302	1.32395	1.35222	1.34609	1.3609	1.35949	1.3829	1.31462	1.30848	1.29644	1.30665	1.2565	1.27834	1.41742	1.50295	1.46248	1.54389	1.65799	1.75872	1.71937	1.65345	1.76812	1.73755	1.72808
NeuMitoFAP, no chemical	-70.3815	-69.783	-68.7502	-67.6908	-67.0145	-66.6392	-66.5305	-66.4097	-66.3917	-65.5551	-65.4929	-65.1779	-63.7205	-64.6899	-64.8192	-64.1026	-64.111	-63.7922	-64.0642	-63.5477	-62.9374	-62.5034	-61.4546	-60.5945	-59.989	-61.9398	-61.2323	-61.5729	-60.3175	-60.677
	-62.9302	-63.1113	-63.2877	-63.6931	-63.349	-63.429	-63.3136	-63.2511	-63.053	-64.21	-64.5248	-64.0614	-63.2638	-62.9685	-62.7761	-62.4737	-62.4085	-64.8504	-64.8164	-63.7836	-62.4715	-62.727	-62.6366	-62.9982	-63.0923	-63.2402	-63.674	-63.782	-63.392	-63.6606
	-63.5772	-63.6762	-63.6707	-63.8761	-64.2992	-64.6981	-64.8929	-65.239	-64.7109	-65.19	-64.83	-64.7652	-64.1099	-63.8854	-63.8012	-63.3914	-63.3424	-63.1753	-62.7691	-62.4418	-62.393	-62.7367	-62.3798	-62.449	-60.923	-61.2293	-61.1291	-60.9189	-60.5687	-60.805	-60.9043	-60.5906	-60.6636	-60.9506	-60.7362	-60.8916	-60.8315	-60.811	-61.299	-60.7866
	-70.2193	-70.546	-70.6177	-70.7649	-70.8686	-70.8598	-71.0289	-71.1955	-71.3493	-71.498	-71.2999	-71.1454	-70.9695	-70.7965	-70.1558	-68.2983	-64.6725	-63.0693	-63.5959	-64.6153	-65.5247	-66.1418	-66.6085	-66.9609	-67.2099	-67.3848	-67.2515	-67.1802	-67.1676	-67.0604	-67.3746	-67.3244	-67.2782	-67.4754	-67.6458	-67.3361	-67.3471	-67.461	-67.2923	-67.2385
	-66.5591	-67.4571	-68.0612	-68.4219	-68.7779	-69.0825	-69.4549	-69.9078	-69.9436	-70.1815	-70.2435	-70.6055	-70.687	-70.6694	-70.5046	-69.9746	-69.5393	-68.9787	-68.2818	-68.3732	-68.1326	-68.0869	-67.6009	-67.4986	-67.3037	-66.9414	-66.7373	-65.0414	-65.8965	-65.8502	-65.0218	-64.8357	-65.0019	-65.4507	-65.2332	-64.9803	-64.9479	-64.6771	-64.7195	-63.7771
Mean	-66.7335	-66.9147	-66.8775	-66.8893	-66.8618	-66.9417	-67.0442	-67.2006	-67.0897	-67.3269	-67.2782	-67.1511	-66.5502	-66.6019	-66.4114	-65.6481	-64.8148	-64.7732	-64.7055	-64.5523	-64.2918	-64.4392	-64.1361	-64.1002	-63.7036	-64.1471	-64.0048	-63.6991	-63.4685	-63.6106
SE	1.57982	1.52742	1.4503	1.36576	1.39025	1.36746	1.42299	1.4724	1.56091	1.46572	1.44445	1.53329	1.75223	1.70845	1.63306	1.4714	1.24087	1.09797	0.953801	1.01631	1.1186	1.1354	1.23777	1.34096	1.53554	1.27474	1.30525	1.14405	1.37699	1.29223
NeuMitoFAP, MG2I+	-66.9715	-67.2194	-67.2907	-67.2207	-67.1423	-67.0971	-67.1922	-67.1696	-66.9882	-66.7135	-67.003	-67.7524	-68.2513	-69.0655	-69.8337	-70.0492	-69.8955	-69.8676	-69.5378	-69.4825	-69.2355	-69.023	-68.3251	-66.9673	-65.8726	-64.6584	-63.9155	-61.3762	-58.7522	-52.3208	-45.755	-31.1006	-27.5868	-28.2497	-29.3586	-34.1349	-35.5448	-30.7921	-26.6895	-28.477
	-66.4217	-66.4405	-66.2249	-65.935	-65.8239	-65.7509	-65.7549	-65.8623	-65.8042	-65.7181	-65.4965	-65.6442	-65.6428	-64.0587	-60.4539	-60.4616	-60.8916	-59.1812	-55.9658	-53.9599	-53.0609	-56.8397	-59.1637	-58.9962	-57.5838	-55.2793	-50.544	-51.1191	-48.429	-48.5309	-46.3759	-45.3175	-44.1392	-44.1412	-42.4706	-40.1523	-39.4628	-40.1869	-39.5475	-39.9026
	-66.223	-66.2873	-66.7888	-66.8746	-67.0946	-66.8955	-66.2179	-66.9097	-66.4321	-66.5139	-66.3768	-66.4152	-66.3824	-66.3811	-66.1144	-66.0002	-66.2571	-66.364	-66.4899	-66.6649	-66.6066	-67.3674	-55.9308	-66.3939	-66.7471	-66.3237	-56.7821	-34.0377	-22.2224	-28.864	-39.8567	-42.811	-39.5705	-32.2899	-35.0117	-35.7656	-35.099	-39.8803	-42.3967	-41.1477
	-64.8743	-65.4109	-65.3327	-64.9008	-64.7439	-65.1077	-64.8671	-64.7017	-64.6511	-64.4699	-63.5916	-63.9832	-63.5496	-63.4851	-63.4505	-63.0758	-62.9982	-62.7192	-61.5092	-56.7262	-56.5134	-55.9978	-56.8127	-56.5843	-56.8758	-55.6658	-55.115	-55.2256	-57.1629	-56.9711	-57.0477	-55.8986	-54.7529	-54.9977	-54.9649	-51.5617	-49.6013	-52.0869	-51.9465	-51.9711
	-52.2151	-52.8114	-53.566	-53.8066	-53.2246	-53.474	-54.0333	-54.2609	-54.3818	-54.5174	-53.8753	-53.9616	-54.1866	-54.0553	-53.7248	-53.9052	-53.047	-52.8886	-53.1008	-52.3089	-50.3892	-50.8355	-49.7213	-47.7884	-43.6297	-41.9418	-42.4895	-42.2568	-41.2609	-37.5579
	-51.9657	-52.0458	-51.947	-51.9441	-52.0073	-51.9011	-51.7778	-52.3139	-51.9085	-51.728	-51.4275	-51.4341	-50.6749	-50.5165	-50.2769	-50.0451	-50.2882	-50.0707	-50.0074	-48.1267	-47.4359	-48.053	-47.4072	-47.45	-43.3956	-44.7913	-43.2011	-41.349	-40.8721	-40.9873
	-47.7672	-48.1217	-48.5196	-49.0256	-49.0901	-48.6247	-49.1406	-48.6341	-48.6081	-48.1515	-48.6181	-48.646	-48.0659	-46.8866	-43.4678	-42.7175	-41.4138	-35.2512	-31.9629	-28.6805	-28.0862	-25.7161	-21.5803	-19.4153	-19.8222	-18.8852	-21.0753	-18.7399	-16.4252	-12.9855
	-68.5679	-68.7318	-69.4778	-70.0329	-69.7931	-69.5258	-69.2152	-68.5973	-68.0428	-67.8504	-67.4605	-67.128	-66.8321	-66.9554	-67.1591	-67.9118	-68.6008	-68.8087	-68.5897	-68.3434	-67.5201	-67.1335	-66.6452	-66.8028	-66.1156	-66.6535	-66.0856	-65.6603	-65.2466	-64.8635	-63.9247	-63.6163	-64.4061	-64.73	-63.6975	-61.7819	-58.4012	-52.4465	-20.5368	-23.2787
	-54.9499	-55.2806	-56.4931	-56.3474	-57.5949	-56.7076	-56.4025	-55.7354	-55.5725	-56.4836	-45.4297	-55.2993	-56.1303	-53.6299	-50.4023	-41.0526	-42.2941	-44.6095	-52.3998	-51.7192	-50.8203	-48.3698	-37.7345	-37.6785	-38.549	-37.6422	-27.7522
	-65.0047	-65.0303	-64.809	-64.8054	-64.8189	-63.9575	-64.3803	-64.389	-64.1375	-64.3414	-64.0455	-63.9461	-63.4901	-63.256	-63.6276	-62.8994	-60.7094	-47.2094	-33.5362	-34.547	-34.9895	-35.0479	-30.8871	-30.6548	-30.1369	-28.1828	-25.4353	-18.8293	-9.74132	-2.47429
Mean	-60.4961	-60.738	-61.045	-61.0893	-61.1334	-60.9042	-60.8982	-60.8574	-60.6527	-60.6488	-59.3324	-60.421	-60.3206	-59.829	-58.8511	-57.8118	-57.6396	-55.697	-54.31	-53.0559	-52.4657	-52.4384	-49.4208	-49.8731	-48.8728	-48.0024	-45.2395	-43.1771	-40.0125	-38.395
SE	2.70296	2.67797	2.64331	2.61465	2.59154	2.61769	2.53815	2.54671	2.51661	2.50703	2.95463	2.52934	2.57682	2.72584	3.05371	3.60355	3.6453	3.94486	3.93309	4.22587	4.27737	4.5104	4.8928	5.30409	5.28984	5.31138	5.13715	5.12655	5.79204	5.52761
NeuMitoFAP + MG2I + phosphocreatine	-57.5634	-57.7119	-57.5312	-57.4463	-57.607	-57.748	-57.7059	-57.2672	-56.2115	-55.0899	-55.1937	-55.3071	-55.7762	-55.9689	-55.8248	-55.3137	-55.3483	-55.2125	-55.012	-54.4786	-54.0089	-54.145	-53.2163	-53.3913	-52.405	-52.24	-50.888	-48.6163	-48.1156	-46.5659	-44.59	-44.3416	-41.5781	-38.7836	-38.1885
	-64.1768	-63.9042	-63.387	-62.7639	-62.5211	-62.6713	-62.517	-62.3908	-62.0675	-62.2738	-62.0157	-61.8634	-61.8735	-62.0515	-63.2177	-63.8479	-63.3522	-63.2879	-62.8198	-62.5547	-62.3358	-61.8412	-61.4129	-60.9725	-61.3208	-61.072	-61.1635	-60.9556	-60.6711	-60.2526
	-63.6507	-63.1221	-63.0435	-63.3733	-62.9273	-62.4752	-62.1326	-62.2461	-61.9327	-62.2561	-63.688	-64.6544	-64.9193	-65.5199	-65.6615	-65.4434	-65.2839	-65.6307	-64.9205	-63.8715	-63.5463	-63.4628	-63.1407	-63.3102	-62.9849	-62.4611	-61.9295	-61.1887	-61.1225	-60.7954	-60.4396	-60.579	-60.3332	-51.3684	-54.3281
	-62.2036	-62.152	-62.0899	-61.7353	-61.7273	-61.2613	-61.431	-61.5682	-61.6668	-61.5415	-61.3211	-61.368	-61.2227	-60.913	-60.9412	-60.7737	-61.0008	-60.0629	-60.3347	-59.8097	-59.329	-57.462	-57.5045	-57.2055	-59.3944	-60.2975	-60.6987	-60.1931	-60.0712	-59.6463	-58.4911	-59.0285	-58.5538	-58.6627	-58.3656
	-66.4584	-66.7194	-66.9177	-67.138	-66.9914	-67.212	-67.2994	-67.2548	-67.252	-67.1418	-67.0929	-67.2078	-66.993	-67.1239	-67.1174	-67.1746	-67.3991	-67.4491	-67.5606	-67.5522	-67.3869	-67.6041	-67.779	-67.6078	-67.724	-67.6574	-67.8386	-67.6586	-67.4223	-66.9243	-67.1827	-67.1196	-67.0528	-66.6353	-66.4906	-66.4284	-66.0861	-65.9938	-65.6247	-65.6013
	-64.9077	-64.8459	-64.9785	-65.266	-65.3717	-65.3274	-65.2143	-64.6803	-64.3877	-64.2446	-64.4298	-64.2064	-61.9919	-63.7095	-63.5504	-63.4695	-63.6818	-63.704	-63.6108	-63.9044	-64.0223	-63.583	-64.1262	-64.0813	-64.5683	-64.5297	-64.2814	-64.0106	-63.7331	-64.4731	-64.4731
Mean	-63.1601	-63.0759	-62.9913	-62.9538	-62.8576	-62.7826	-62.7167	-62.5679	-62.253	-62.0913	-62.2902	-62.4345	-62.1294	-62.5478	-62.7188	-62.6705	-62.6777	-62.5579	-62.3764	-62.0285	-61.7715	-61.3497	-61.1966	-61.0948	-61.3996	-61.3763	-61.1333	-60.4371	-60.1893	-59.7763
SE	1.25758	1.24797	1.29293	1.35256	1.32128	1.33996	1.34638	1.36212	1.48915	1.62815	1.64288	1.66448	1.55679	1.60546	1.62926	1.70998	1.70372	1.78318	1.76515	1.82234	1.88229	1.96497	2.10597	2.08752	2.14074	2.12369	2.31416	2.61754	2.65685	2.88068
each row shows a different zebrafish, values in columns show the mean membrane potenatil in mV for the minute prior to the time marker
