# Supplementary material for: Chemoptogenetic ablation of neuronal mitochondria in vivo with spatiotemporal precision and controllable severity
Source: eLife. 2020 Mar 17;9:e51845. doi: 10.7554/eLife.51845 (PMC7077989; doi:10.7554/eLife.51845)
Supplement: Figure 4—source data 1. [file elife-51845-fig4-data1.xlsx]

## Sheet: Figure 4A
ATP (mMol/ug protein)
		NeuMitoFAP, MG2I
		Light -	Light +
		5.10504	4.56613
		4.50809	4.11314
		4.3076	3.54064
		4.04803	4.25216
		4.00828	3.7706
		3.80343	3.7854
		4.0233	3.2986
		3.42685	2.88647
		5.29929	4.79718
		4.41134	4.2922
		5.27327	4.53796
		4.86624	4.37591
		4.1317	4.32229
		4.74966	4.38269
		4.9163	4.122
		4.52979	4.01439
		3.48622	2.6745
		3.31606	3.26252
		3.45718	3.33815
		3.80797	3.07882
		3.85297	2.94077
		3.85356	3.0914
		3.5471	3.32534
		3.72152	3.45997
		3.49621	3.17238
		4.26083	3.44492
		4.87462	3.32846
		3.44337	3.83516
		3.40383	2.90537
		3.82153	2.90522
		3.97377	3.6581
		4.09975	4.70731
	Mean	4.11952	3.69332
	SE	0.103365	0.108196
	each replicate data point = lysate of 8 larval zebrafish
