# Supplementary material for: Chemoptogenetic ablation of neuronal mitochondria in vivo with spatiotemporal precision and controllable severity
Source: eLife. 2020 Mar 17;9:e51845. doi: 10.7554/eLife.51845 (PMC7077989; doi:10.7554/eLife.51845)
Supplement: Figure 4—source data 2. [file elife-51845-fig4-data2.xlsx]

## Sheet: Figure 4B
OCR (pMol/min)
		NeuMitoFAP			Non-Tg
		No chemical	MG2I		No chemical	MG2I
		206.5	163.4		56.43	98.83
		207.5	122.8		109.4	158.9
		104.9	174		187.1	122.5
		244.6	123		112.8	118.4
		189.2	157.3		128.5	48.54
		223	166		142.2	105.6
		188.2	144.3		137.2	245.2
		199.8	209		198.2	189.8
		150.2	127.6		172	168.8
		156.6	81.11		168.6	59.06
		200.4	113.2		167.6	237.8
		241.6	118.3		204.9	274.1
		151.4	118.1		238.6	296.3
		177.7	122.2		181	192.1
		102.5	102.8		232.8	210.9
		105.2	120.8		203.9	83.41
		95.33	177.6		210.5	140.4
		151.3	216.6		260.9	292.5
		118.1	100.4		159.4	127.3
		154.2	165.7		137.3	193.3
		182	90.25		245.2	283.8
		167.6	129.5		251.2	238
		142.1	139.3		262.9	251.5
		132.5	80.78		125.4	225
		269.7	107.3		284.8	258.5
		166.1	61.64		279.1	306.2
		257.1	62.81		236.9	241.2
		146.7	151.4		285.6	106.3
		118	99.01		270	208.5
	Mean	170.691	129.179		194.842	189.06
	each replicate data point = single zebrafish following 60J/cm2 exposure @ 660nm
