# Supplementary material for: Chemoptogenetic ablation of neuronal mitochondria in vivo with spatiotemporal precision and controllable severity
Source: eLife. 2020 Mar 17;9:e51845. doi: 10.7554/eLife.51845 (PMC7077989; doi:10.7554/eLife.51845)
Supplement: Figure 4—source data 3. [file elife-51845-fig4-data3.xlsx]

## Sheet: Figure 4D, E
OCR (pMol/min)
	Time (minutes)	NeuMitoFAP, no chemical										Mean		NeuMitoFAP, MG2I										Mean
	1.83333	85.1567	135.51	147.964	117.094	42.4342	117.909	109.031	200.745	131.74	121.155	120.874		186.662	113.201	74.9501	108.84	97.4548	151.923	157.758	94.617	68.5051	34.6746	108.859
	7.8	115.011	265.896	149.373	193.258	89.7793	133.784	110.981	239.412	166.464	170.369	163.433		176.553	186.545	85.0013	102.683	114.274	158.32	193.856	113.205	80.4865	59.109	127.003
	13.7833	127.154	282.153	158.988	249.128	92.7313	141.526	112.084	211.53	187.808	221.609	178.471		180.997	198.758	96.3179	103.818	109.701	159.284	213.377	115.348	82.6693	66.5926	132.686
	19.75	129.23	298.13	156.083	254.146	85.9693	136.864	104.767	204.139	164.897	203.577	173.78		175.796	197.334	99.483	94.7364	106.289	151.069	201.391	109.159	71.2152	68.9975	127.547
	25.7167	131.794	295.638	162.209	262.595	89.4179	140.576	109.888	242.88	185.941	270.868	189.181		188.82	114.279	110.986	90.9929	116.855	151.487	194.49	107.754	70.0544	75.2456	122.096
	31.7	132.186	303.422	169.739	274.899	90.4976	135.001	108.657	266.049	108.755	263.184	185.239		191.887	162.635	118.238	82.0556	116.106	147.08	181.774	105.548	68.84	77.8899	125.205
	37.6667	134.068	292.008	176.134	282.225	92.0197	130.479	107.219	235.09	175.426	274.683	189.935		201.421	205.63	124.277	80.0331	120.241	147.428	174.851	108.233	65.1989	82.8317	131.014
	43.6333	131.888	294.293	177.971	289.886	88.3888	119.651	106.679	190.306	155.821	286.474	184.136		204.999	103.738	120.229	78.1188	128.642	145.979	172.575	112.893	65.7969	92.9828	122.595
	49.6167	128.878	306.197	187.085	285.766	89.6873	119.753	115.462	220.603	155.558	227.958	183.695		210.644	201.804	119.031	75.4293	131.853	148.83	174.35	121.053	71.7446	102.54	135.728
	55.5833	121.609	309.81	188.322	222.699	87.6357	116.901	118.364	215.081	153.088	231.502	176.501		217.237	216.395	118.823	71.5144	130.295	147.602	169.264	120.05	64.4385	100.343	135.596
	61.5667	117.273	309.34	194.152	277.995	86.788	116.602	120.346	216.246	139.399	231.36	180.95		222.189	207.965	120.128	71.3077	132.348	145.53	169.721	121.958	86.1581	101.706	137.901
	67.5833	112.652	299.389	196.429	268.024	87.5734	115.561	122.636	198.418	158.895	235.536	179.511		223.895	240.855	117.901	67.6144	128.064	148.703	168.712	119.353	89.4841	103.302	140.788
	73.6333	108.382	309.514	194.722	275.757	87.5461	112.805	123.932	215.34	156.529	239.64	182.417		226.765	223.526	120.171	67.8255	129.546	147.297	171.677	119.879	99.5558	100.997	140.724
	79.75	107.695	315.27	201.801	274.127	90.905	115.252	127.739	220.312	154.616	287.142	189.486		232.019	217.311	123.321	66.9975	130.774	147.77	179	121.993	106.107	103.095	142.839
	85.6167	102.614	289.394	195.236	287.554	91.2756	115.764	128.066	228.393	145.95	297.906	188.215		225.54	235.42	119.207	62.4924	128.991	144.025	174.203	116.991	109.995	101.327	141.819
	91.7167	101.386	311.709	197.907	277.787	92.9758	116.043	132.683	236.276	145.367	310.328	192.246		229.645	229.909	120.022	60.4417	128.569	143.069	181.416	116.115	108.442	103.067	142.07
	97.6333	95.5552	316.507	193.726	310.792	88.6109	112.538	134.111	235.796	178.948	298.025	196.461		228.559	238.419	119.602	56.6909	129.28	141.353	178.913	115.514	108.307	106.735	142.337
	103.55	98.916	302.33	192.496	283.152	86.6358	110.815	132.906	241.469	143.038	304.651	189.641		228.491	219.626	117.309	52.3854	128.455	140.778	164.916	114.509	109.658	109.798	138.593
	109.55	95.1124	311.22	188.492	215.173	84.6286	111.358	131.43	243.789	142.66	283.21	180.707		223.621	221.774	113.083	46.1305	125.611	142.332	158.665	110.215	106.031	110.242	135.77
	115.567	93.8962	317.67	188.133	292.321	84.0141	110.688	130.682	268.824	171.538	249.216	190.698		223.608	231.051	112.341	44.4515	126.128	143.129	158.221	110.57	105.986	116.931	137.242
	121.6	90.2994	330.501	188.575	283.609	83.0132	107.028	128.969	265.799	167.342	236.775	188.191		225.08	248.901	109.947	39.0579	128.105	142.805	154.895	108.776	103.073	117.558	137.82
	127.65	87.5418	336.01	185.426	242.156	81.2478	104.772	128.83	271.939	157.206	224.916	182.004		223.965	218.493	107.975	35.0219	127.973	144.167	153.705	108.132	105.535	118.788	134.375
	133.75	88.098	350.763	188.217	280.963	84.6275	100.045	129.459	275.904	161.585	244.259	190.392		225.332	213.293	106.002	33.1151	128.339	142.419	150.054	103.615	102.299	117.227	132.169
	139.65	85.7002	345.054	194.736	294.158	85.8895	96.5189	129.489	276.432	166.494	245.796	192.027		231.162	192.423	106.298	30.449	132.217	147.79	156.538	106.624	105.008	122.495	133.1
		each replicate data point = single zebrafish at time point shown
