# Supplementary material for: Chemoptogenetic ablation of neuronal mitochondria in vivo with spatiotemporal precision and controllable severity
Source: eLife. 2020 Mar 17;9:e51845. doi: 10.7554/eLife.51845 (PMC7077989; doi:10.7554/eLife.51845)
Supplement: Figure 4—source data 4. [file elife-51845-fig4-data4.xlsx]

## Sheet: Figure 4F
OCR (pMol/min)
		Time (min)	No light				30J/cm2
			#1	#2	#3	#4	#1	#2	#3	#4
	Baseline	1.85	32.62	31.4	33.16	30.53	30.89	39.07	32.34	31.88
		8.57	33.23	29.41	32.62	30.72	27.97	37.04	27.95	27.8
		15.32	33.22	29.19	31.75	28.73	22.39	32.91	27.39	26.55
	Oligomycin	22.25	25.24	20.34	25.46	19.93	17.98	27.15	20.27	22.16
		28.98	25.83	21.29	26.54	21.87	18.63	26.93	22.64	22.31
		35.73	26.91	22.59	27.94	21.87	19.21	28.05	22.35	21.97
	FCCP	42.67	59.69	66.87	58.33	68.94	38.72	44.43	43.49	36.89
		49.4	66.7	64	62.33	62.31	43.16	45.29	43.42	43.32
		56.13	65.68	64.05	63.69	62.79	40.28	45.17	44.96	45.42
	rotenone + antimycinA	63.08	13.5	10.39	11.93	10.52	7.16	21.29	14.24	11.86
		69.82	12.38	10.34	11.69	10.21	5	16.59	10.73	10.71
		76.55	13.3	11.85	12.05	11.16	4.34	18.01	11.99	11.72
			each column is an experiemental replicate
