# Supplementary material for: Chemoptogenetic ablation of neuronal mitochondria in vivo with spatiotemporal precision and controllable severity
Source: eLife. 2020 Mar 17;9:e51845. doi: 10.7554/eLife.51845 (PMC7077989; doi:10.7554/eLife.51845)
Supplement: Figure 5—source data 1. [file elife-51845-fig5-data1.xlsx]

## Sheet: Figure 5B
Mitochondrial number
		Group
	Zebrafish	MG2I - Light -	MG2I - Light +	MG2I + Light -	MG2I + Light +
	#1	105	79	89	162
	#2	80	76	81	125
	#3	58	65	85	115
	#4	69	92	66	155
	#5	63	67	86	93
	#6	78	90	88	140
	Mean	75.5	78.1667	82.5	131.667
	SE	6.83496	4.60012	3.49046	10.5693
