# Supplementary material for: Chemoptogenetic ablation of neuronal mitochondria in vivo with spatiotemporal precision and controllable severity
Source: eLife. 2020 Mar 17;9:e51845. doi: 10.7554/eLife.51845 (PMC7077989; doi:10.7554/eLife.51845)
Supplement: Figure 5—source data 2. [file elife-51845-fig5-data2.xlsx]

## Sheet: Figure 5C
Mitochondrial length (um)
	Group
	MG2I- Light-						MG2I- Light+						MG2I+ Light-						MG2I+ Light+
	#1	#2	#3	#4	#5	#6	#1	#2	#3	#4	#5	#6	#1	#2	#3	#4	#5	#6	#1	#2	#3	#4	#5	#6
	0.22	0.22	0.24	0.22	0.29	0.25	0.24	0.33	0.24	0.24	0.28	0.24	0.25	0.28	0.24	0.26	0.21	0.25	0.21	0.28	0.25	0.22	0.24	0.25
	0.23	0.22	0.28	0.24	0.33	0.3	0.44	0.42	0.24	0.24	0.4	0.25	0.31	0.3	0.28	0.36	0.31	0.34	0.23	0.28	0.25	0.22	0.27	0.25
	0.25	0.22	0.28	0.34	0.33	0.33	0.47	0.45	0.32	0.25	0.4	0.31	0.34	0.39	0.3	0.39	0.32	0.34	0.23	0.29	0.31	0.23	0.28	0.25
	0.25	0.28	0.32	0.38	0.42	0.34	0.5	0.53	0.38	0.26	0.41	0.33	0.36	0.46	0.33	0.4	0.4	0.34	0.24	0.31	0.31	0.23	0.29	0.25
	0.3	0.3	0.38	0.42	0.44	0.4	0.53	0.54	0.4	0.28	0.45	0.47	0.39	0.49	0.33	0.43	0.44	0.41	0.24	0.31	0.31	0.23	0.32	0.25
	0.34	0.32	0.43	0.48	0.48	0.42	0.58	0.55	0.45	0.29	0.47	0.49	0.4	0.53	0.38	0.46	0.47	0.41	0.25	0.31	0.33	0.25	0.33	0.26
	0.34	0.32	0.45	0.49	0.67	0.48	0.63	0.56	0.57	0.31	0.64	0.52	0.41	0.56	0.39	0.53	0.48	0.42	0.25	0.32	0.35	0.28	0.33	0.27
	0.36	0.32	0.49	0.54	0.69	0.54	0.67	0.61	0.6	0.31	0.8	0.52	0.42	0.57	0.4	0.59	0.49	0.43	0.25	0.32	0.35	0.28	0.34	0.28
	0.37	0.36	0.49	0.63	0.72	0.63	0.67	0.62	0.65	0.32	0.94	0.54	0.42	0.59	0.44	0.62	0.51	0.51	0.25	0.32	0.37	0.29	0.39	0.28
	0.37	0.37	0.51	0.8	0.83	0.71	0.69	0.69	0.65	0.34	1.01	0.54	0.43	0.63	0.46	0.63	0.57	0.54	0.25	0.34	0.37	0.3	0.4	0.28
	0.39	0.47	0.64	0.82	0.84	0.72	0.75	0.77	0.67	0.38	1.03	0.58	0.47	0.63	0.46	0.67	0.61	0.55	0.27	0.35	0.37	0.31	0.42	0.28
	0.41	0.55	0.66	0.89	0.93	0.73	0.92	0.78	0.67	0.39	1.03	0.59	0.48	0.65	0.48	0.76	0.63	0.71	0.28	0.36	0.39	0.32	0.45	0.31
	0.42	0.65	0.68	0.94	1	0.77	1.01	0.88	0.7	0.39	1.08	0.6	0.52	0.7	0.5	0.79	0.63	0.72	0.28	0.37	0.39	0.32	0.45	0.31
	0.43	0.67	0.68	1.03	1.04	0.86	1.01	0.88	0.71	0.39	1.21	0.63	0.62	0.77	0.54	0.83	0.71	0.73	0.28	0.38	0.39	0.33	0.45	0.31
	0.44	0.69	0.7	1.16	1.08	0.9	1.02	0.97	0.81	0.4	1.27	0.72	0.66	0.77	0.65	0.83	0.84	0.77	0.3	0.38	0.39	0.37	0.46	0.33
	0.49	0.69	0.73	1.4	1.11	1.01	1.03	1.08	0.87	0.41	1.45	0.83	0.68	0.79	0.68	0.84	0.85	0.84	0.31	0.39	0.39	0.37	0.47	0.36
	0.52	0.69	0.76	1.45	1.12	1.14	1.04	1.08	0.99	0.41	1.5	0.87	0.68	0.85	0.72	0.87	0.95	0.89	0.31	0.41	0.41	0.39	0.5	0.36
	0.55	0.79	0.8	1.49	1.19	1.14	1.36	1.13	1.24	0.43	1.55	0.87	0.8	0.87	0.78	0.96	1.02	0.94	0.31	0.41	0.42	0.39	0.51	0.37
	0.65	0.84	0.83	1.5	1.22	1.16	1.44	1.31	1.24	0.44	1.71	0.89	0.87	0.97	0.87	1.02	1.09	0.94	0.31	0.42	0.45	0.42	0.52	0.37
	0.69	0.86	0.99	1.54	1.29	1.17	1.51	1.39	1.27	0.44	1.75	1	0.92	1.01	0.93	1.03	1.11	0.95	0.32	0.43	0.45	0.43	0.52	0.37
	0.7	1.01	1.57	1.62	1.52	1.31	1.52	1.46	1.3	0.44	2.01	1.01	1.07	1.02	1.02	1.06	1.17	1	0.33	0.43	0.45	0.43	0.53	0.38
	0.71	1.01	1.73	1.64	1.54	1.5	1.7	1.56	1.38	0.58	2.21	1.04	1.23	1.05	1.05	1.24	1.2	1.16	0.33	0.43	0.45	0.46	0.53	0.38
	0.71	1.03	1.77	1.65	1.55	1.5	1.73	1.6	1.38	0.59	2.31	1.05	1.24	1.14	1.05	1.54	1.25	1.19	0.33	0.43	0.46	0.47	0.54	0.4
	0.79	1.21	1.97	1.86	1.72	1.62	1.76	1.7	1.66	0.65	2.47	1.08	1.35	1.18	1.06	1.65	1.27	1.21	0.33	0.45	0.47	0.47	0.56	0.41
	0.79	1.29	1.99	1.87	1.73	1.74	1.76	1.74	1.66	0.82	2.56	1.14	1.43	1.21	1.07	1.72	1.28	1.27	0.34	0.47	0.47	0.47	0.58	0.42
	0.87	1.35	2.12	1.97	1.83	1.95	1.83	1.76	1.71	0.84	2.65	1.21	1.45	1.25	1.11	1.75	1.32	1.29	0.34	0.47	0.47	0.5	0.58	0.43
	0.91	1.45	2.25	2	1.9	1.99	1.88	1.76	1.77	0.94	2.67	1.42	1.47	1.26	1.14	1.81	1.33	1.32	0.35	0.47	0.47	0.51	0.61	0.44
	0.97	1.47	2.28	2.1	1.91	2.07	2.04	1.77	1.78	1.23	2.68	1.45	1.53	1.27	1.18	2.29	1.33	1.63	0.36	0.49	0.47	0.51	0.61	0.44
	1.02	1.48	2.39	2.24	1.95	2.27	2.07	1.83	1.85	1.27	2.69	1.61	1.81	1.31	1.26	2.5	1.33	1.83	0.36	0.5	0.49	0.51	0.61	0.44
	1.17	1.49	2.52	2.27	2.11	2.35	2.08	1.9	1.86	1.33	2.79	1.64	1.85	1.34	1.37	2.61	1.35	1.97	0.36	0.51	0.5	0.53	0.61	0.45
	1.22	1.54	2.67	2.89	2.19	2.35	2.14	1.97	1.95	1.42	2.82	1.65	1.92	1.37	1.43	3.12	1.53	2	0.36	0.52	0.5	0.53	0.64	0.46
	1.25	1.67	2.75	3.2	2.41	2.36	2.18	2.03	2.04	1.48	3.27	1.79	2.02	1.4	1.44	3.19	1.7	2.08	0.36	0.56	0.51	0.53	0.65	0.46
	1.27	1.7	2.78	3.26	2.43	2.46	2.23	2.08	2.14	1.62	3.33	1.89	2.05	1.43	1.51	3.41	1.7	2.4	0.36	0.56	0.53	0.53	0.68	0.47
	1.36	1.78	2.9	3.29	2.73	2.49	2.26	2.11	2.27	1.71	3.54	1.99	2.16	1.46	1.62	3.56	1.71	2.44	0.36	0.59	0.53	0.54	0.69	0.48
	1.49	1.78	2.9	3.86	3.12	2.56	2.36	2.13	2.34	1.88	3.74	2.04	2.23	1.46	2	3.75	1.73	2.45	0.38	0.59	0.54	0.55	0.71	0.5
	1.72	1.83	3.09	4.11	3.32	2.75	2.41	2.23	2.37	1.98	3.79	2.06	2.33	1.5	2.2	3.83	1.76	2.47	0.38	0.61	0.55	0.59	0.81	0.5
	1.74	1.92	3.2	4.13	3.43	2.76	2.51	2.23	2.46	1.99	4.21	2.07	2.35	1.58	2.2	3.93	1.83	2.56	0.4	0.64	0.56	0.59	0.82	0.5
	1.74	1.99	3.22	4.17	3.55	3	2.66	2.4	2.47	2	4.3	2.25	2.36	1.64	2.22	4.14	1.86	2.7	0.41	0.65	0.56	0.61	0.82	0.51
	1.79	2.07	3.62	4.28	3.89	3.2	2.76	2.47	2.51	2.01	4.48	2.31	2.36	1.72	2.23	4.54	1.88	2.71	0.41	0.66	0.58	0.61	0.83	0.53
	1.84	2.14	3.63	4.32	4.21	3.26	2.8	2.88	2.73	2.24	4.68	2.34	2.39	1.77	2.24	4.76	1.91	2.74	0.41	0.68	0.58	0.61	0.86	0.53
	1.87	2.72	3.73	4.69	4.31	3.31	2.84	2.94	2.87	2.26	4.73	2.35	2.44	1.98	2.26	4.82	1.92	2.76	0.41	0.68	0.61	0.64	0.86	0.53
	1.87	2.77	3.86	5.1	4.58	3.44	2.9	3.04	3	2.34	4.96	2.66	2.47	2.17	2.53	5.02	2.02	2.83	0.42	0.68	0.61	0.66	0.93	0.55
	2	2.87	3.9	5.13	4.64	3.86	2.9	3.08	3.23	2.59	5.19	2.85	2.48	2.22	2.6	5.29	2.03	2.88	0.42	0.68	0.62	0.66	0.99	0.55
	2.02	2.94	4.41	5.14	4.68	3.89	2.95	3.11	3.45	2.69	5.23	2.9	2.6	2.31	2.67	5.39	2.05	3.21	0.42	0.72	0.64	0.67	1.07	0.55
	2.06	2.95	4.84	5.15	4.68	3.9	3.01	3.17	3.93	2.75	5.53	2.96	2.74	2.36	2.94	5.44	2.28	3.22	0.44	0.72	0.64	0.67	1.08	0.55
	2.16	3.16	5.24	5.5	5.3	4.06	3.03	3.29	4.17	2.88	5.61	3.07	2.81	2.39	3.01	5.48	2.74	3.26	0.46	0.74	0.64	0.68	1.12	0.57
	2.38	3.45	5.48	5.54	5.31	4.14	3.03	3.85	4.34	3.09	5.61	3.31	3.25	2.49	3.06	5.59	2.84	3.34	0.46	0.77	0.66	0.71	1.14	0.57
	2.54	3.46	5.82	5.64	5.38	4.23	3.17	4.37	4.48	3.22	5.72	3.37	3.32	2.66	3.28	5.69	3	3.35	0.47	0.87	0.67	0.71	1.17	0.57
	2.57	3.47	7.42	5.75	5.43	4.62	3.18	4.53	4.72	3.22	6.07	3.41	3.64	3.16	3.32	5.89	3.05	3.47	0.48	0.87	0.68	0.72	1.17	0.6
	2.58	3.57	7.45	6.16	5.97	4.72	3.34	4.64	4.79	3.31	6.07	3.59	3.75	3.19	3.36	6.01	3.12	3.66	0.49	0.87	0.69	0.72	1.18	0.6
	2.61	3.7	8.17	6.43	6.79	4.84	3.61	4.74	4.87	3.38	6.41	3.63	3.76	3.39	3.56	6.11	3.33	3.74	0.49	0.89	0.71	0.73	1.2	0.61
	2.72	3.76	8.86	6.53	7.48	5.01	3.71	4.74	5.37	3.51	6.46	3.67	3.78	3.48	3.63	6.48	3.37	3.86	0.5	0.91	0.71	0.77	1.23	0.62
	2.76	3.81	8.94	6.66	7.55	5.42	3.93	5.47	5.4	3.58	6.78	3.74	4.08	3.62	3.67	6.56	3.38	3.93	0.5	0.91	0.72	0.77	1.26	0.62
	2.77	3.84	9.16	6.88	7.6	5.57	3.99	5.51	5.45	3.63	7.06	4.21	4.17	3.73	3.68	6.59	3.5	3.96	0.5	0.93	0.72	0.86	1.26	0.65
	2.78	3.92	11.56	6.95	8.98	5.57	4.15	5.57	5.5	3.79	7.94	4.26	4.23	3.86	3.98	7.42	3.54	3.98	0.5	0.99	0.72	0.86	1.3	0.66
	2.87	3.93	12.06	7.05	9.27	5.66	4.18	5.67	5.58	3.97	8.57	4.36	4.27	4.01	3.98	7.45	3.58	4.23	0.51	1.01	0.78	0.89	1.36	0.67
	2.97	3.98	12.46	7.14	9.6	5.87	4.23	5.73	5.6	3.97	9.11	4.39	4.27	4.17	4.03	7.84	3.72	4.28	0.52	1.02	0.79	0.9	1.45	0.67
	2.99	4.46	12.92	7.67	10.28	5.91	4.34	6.04	6.76	4.07	9.79	4.52	4.41	4.23	4.11	8.12	3.97	4.55	0.53	1.04	0.87	0.94	1.57	0.68
	3.08	4.54		8.03	10.66	6.17	4.5	6.32	7.49	4.14	10.65	4.58	4.48	4.25	4.15	8.48	4.18	4.62	0.54	1.07	0.87	0.95	1.58	0.69
	3.15	5.05		8.44	11.09	6.25	4.51	6.61	8.26	4.52	10.74	4.59	4.54	4.3	4.24	9.2	4.24	4.63	0.54	1.08	0.89	0.96	1.6	0.69
	3.15	5.05		8.46	11.12	6.26	4.66	6.66	8.42	4.69	11.29	4.68	4.58	4.44	4.3	9.25	4.38	4.84	0.55	1.12	0.91	0.98	1.63	0.74
	3.26	5.2		8.75	12.45	6.28	4.73	6.74	8.68	4.71	11.55	4.73	4.78	4.48	4.54	9.88	4.47	4.97	0.55	1.15	0.95	1	1.63	0.74
	3.34	5.87		9.56	21.06	6.38	4.77	6.87	9.08	4.86	11.6	4.75	4.89	4.53	4.56	11.33	4.6	5.07	0.57	1.2	0.95	1.01	1.65	0.76
	3.47	6.02		10.18		6.52	4.82	7.1	9.41	5.23	12.72	4.86	5.1	4.71	5	12.04	4.67	5.29	0.57	1.2	0.97	1.02	1.74	0.79
	3.61	6.09		11.02		6.96	4.86	7.29	10.76	5.33	12.99	5.09	5.29	4.97	5.07	12.48	4.71	5.45	0.57	1.21	0.99	1.03	1.77	0.79
	3.64	6.45		12.48		7.43	5.41	7.56		5.48	13.82	5.64	5.31	5.17	5.18	16.08	4.75	5.65	0.57	1.24	1.02	1.04	1.78	0.8
	3.64	6.63		12.6		7.52	5.53	7.9		5.54	16.99	5.78	5.38	5.27	5.19		5.27	5.75	0.57	1.33	1.07	1.05	1.79	0.83
	3.7	6.66		14.14		7.55	6.36	8.09		5.58		5.85	5.47	5.34	5.74		5.3	5.93	0.58	1.35	1.08	1.06	1.9	0.84
	3.71	7.27		16.85		7.68	6.85	8.63		5.71		6.06	6.04	5.34	5.85		5.3	6.19	0.58	1.35	1.09	1.11	1.94	0.85
	3.79	7.44				7.88	7.44	9.73		6.01		6.08	6.19	5.71	6.1		5.8	6.23	0.6	1.4	1.1	1.12	1.98	0.86
	3.79	7.74				9.45	7.87	9.83		6.01		6.29	6.31	6.31	6.37		5.85	6.27	0.61	1.41	1.14	1.13	2	0.86
	3.79	7.92				10.16	8.36	10.91		6.05		6.69	6.46	6.97	7.12		6.07	6.33	0.61	1.49	1.17	1.13	2.06	0.87
	3.92	8.06				10.21	9.18	11.28		6.06		6.75	6.76	7.63	7.49		6.36	6.43	0.61	1.5	1.27	1.15	2.22	0.91
	3.97	8.09				11.54	10.77	11.57		6.26		7.12	7.09	7.92	7.82		6.4	6.63	0.63	1.63	1.31	1.16	2.25	0.91
	4.13	8.45				11.56	11.73	13.02		6.69		7.74	7.19	8.18	7.92		6.55	6.64	0.65	1.66	1.38	1.16	2.28	0.94
	4.14	9.65				13.39	12.37	14.08		6.97		7.96	7.59	8.43	8.01		7.36	6.68	0.66	1.67	1.39	1.18	2.33	0.98
	4.23	10.3				15.47	13.66			7.45		8.45	7.74	8.59	8.31		7.94	7.18	0.69	1.7	1.39	1.19	2.47	0.99
	4.3	14.82				22.52	16.2			7.81		8.5	7.82	9.91	9.21		7.94	7.35	0.73	1.8	1.42	1.21	2.56	0.99
	4.3	15.01					16.66			7.9		10.02	7.89	10.03	9.36		8.13	7.49	0.75	1.82	1.44	1.22	2.71	0.99
	4.33	15.57								8.23		10.34	7.9	10.27	9.53		8.85	7.65	0.79	1.91	1.44	1.23	2.77	1.01
	4.35									8.38		10.67	9.01	10.36	9.7		10.94	8.81	0.79	1.92	1.45	1.29	2.88	1.04
	4.42									8.74		10.84	9.04		9.99		11.47	10.63	0.85	2.03	1.5	1.29	2.92	1.04
	4.45									8.79		11.99	9.63		11.31		11.92	10.96	0.86	2.06	1.51	1.32	2.97	1.05
	4.82									8.84		12.03	9.99		11.76		12.51	11.51	0.88	2.07	1.51	1.32	3.07	1.05
	4.83									9.09		12.73	10.86		12.03		13.45	11.78	0.89	2.11	1.53	1.37	3.08	1.08
	4.97									11.91		12.76	11.88				15.65	11.94	0.9	2.14	1.53	1.39	3.27	1.11
	5.03									12.49		12.83	12.31					13.22	0.94	2.22	1.61	1.44	3.55	1.11
	5.37									14.12		13.52	13.09					15.4	0.95	2.34	1.65	1.45	3.83	1.15
	5.58									14.14		15.25	26.52						0.96	2.36	1.73	1.5	4.18	1.2
	5.72									14.55		15.7							0.96	2.37	1.77	1.52	4.44	1.2
	5.91									19.11									0.96	2.48	1.78	1.52	5.66	1.23
	6.36									20.22									0.97	2.54	1.79	1.53	5.98	1.5
	6.45																		1.04	2.55	1.82	1.55	6.39	1.53
	6.49																		1.05	2.62	1.95	1.55		1.58
	6.9																		1.06	2.71	2.21	1.57		1.65
	7.08																		1.07	2.72	2.24	1.58		1.66
	8.48																		1.07	2.75	2.33	1.6		1.68
	8.83																		1.09	2.81	2.35	1.6		1.69
	9.5																		1.09	2.82	2.41	1.62		1.72
	9.87																		1.11	3.08	2.45	1.63		1.84
	10.07																		1.12	3.33	2.54	1.73		1.87
	10.6																		1.13	3.41	2.71	1.74		1.9
	11.05																		1.14	3.44	2.81	1.75		1.92
	14.08																		1.14	3.48	2.97	1.78		1.94
	15.59																		1.15	3.51	3.05	1.81		1.95
																			1.17	3.54	3.24	1.82		1.95
																			1.18	3.59	3.39	1.85		2.02
																			1.19	3.62	3.76	1.88		2.13
																			1.19	3.77	4.29	1.88		2.2
																			1.23	4.03	4.39	1.95		2.27
																			1.28	4.11	4.51	2.01		2.44
																			1.31	4.61	4.77	2.02		2.45
																			1.33	4.64	5.96	2.05		2.47
																			1.39	4.69	6.21	2.1		2.49
																			1.42	4.88	6.7	2.13		2.53
																			1.44	5.21		2.23		2.63
																			1.58	5.3		2.28		2.64
																			1.59	5.55		2.3		2.84
																			1.61	5.89		2.3		3.02
																			1.62	5.92		2.32		3.05
																			1.68	6.35		2.32		3.05
																			1.69	6.42		2.33		3.06
																			1.71	6.63		2.33		3.19
																			1.73	7.06		2.35		3.33
																			1.74	11.37		2.37		3.48
																			1.87			2.38		3.49
																			1.98			2.42		3.73
																			2			2.42		3.83
																			2			2.48		3.85
																			2.01			2.52		4.05
																			2.01			2.59		4.11
																			2.05			2.78		4.21
																			2.06			2.85		4.62
																			2.14			2.86		4.8
																			2.16			2.96		4.9
																			2.19			3.03		5.13
																			2.33			3.12		5.14
																			2.39			3.13		5.41
																			2.45			3.15		7.94
																			2.92			3.34		8.09
																			2.98			3.62
																			3.18			3.73
																			3.34			3.77
																			3.62			3.96
																			3.68			4.07
																			3.78			4.24
																			3.84			4.39
																			3.91			4.47
																			3.92			4.66
																			4.01			5.35
																			4.13			5.48
																			4.2			5.79
																			4.62			6.33
																			4.91			6.47
																			5.14			7.01
																			5.23
																			5.44
																			5.47
																			5.51
																			5.66
																			6.11
																			6.52
