# Supplementary material for: Chemoptogenetic ablation of neuronal mitochondria in vivo with spatiotemporal precision and controllable severity
Source: eLife. 2020 Mar 17;9:e51845. doi: 10.7554/eLife.51845 (PMC7077989; doi:10.7554/eLife.51845)
Supplement: Figure 5—source data 3. [file elife-51845-fig5-data3.xlsx]

## Sheet: Figure 5D
Circularity
	Group
	MG2I- Light-						MG2I- Light+						MG2I+ Light-						MG2I+ Light+
	#1	#2	#3	#4	#5	#6	#1	#2	#3	#4	#5	#6	#1	#2	#3	#4	#5	#6	#1	#2	#3	#4	#5	#6
	0.72	0.746	0.758	0.746	0.742	0.699	0.758	0.627	0.644	0.644	0.595	0.644	0.68	0.622	0.706	0.784	0.499	0.653	0.746	0.827	0.85	0.559	0.736	0.699
	0.858	0.765	0.741	0.75	0.824	0.636	0.646	0.552	0.758	0.644	0.607	0.68	0.827	0.544	0.741	0.592	0.827	0.766	0.874	0.827	0.84	0.746	0.739	0.84
	0.68	0.624	0.595	0.509	0.848	0.588	0.567	0.434	0.647	0.763	0.588	0.636	0.57	0.604	0.544	0.494	0.689	0.554	0.858	0.777	0.827	0.874	0.855	0.84
	0.68	0.855	0.689	0.774	0.833	0.509	0.814	0.483	0.687	0.699	0.807	0.627	0.592	0.714	0.827	0.444	0.735	0.76	0.758	0.827	0.684	0.858	0.742	0.85
	0.657	0.62	0.583	0.552	0.473	0.77	0.55	0.547	0.444	0.622	0.866	0.418	0.604	0.787	0.901	0.556	0.58	0.493	0.758	0.798	0.856	0.858	0.647	0.765
	0.57	0.89	0.491	0.694	0.371	0.885	0.466	0.758	0.723	0.564	0.548	0.483	0.444	0.433	0.63	0.58	0.434	0.573	0.85	0.827	0.864	0.84	0.901	0.784
	0.773	0.647	0.434	0.604	0.482	0.805	0.576	0.402	0.552	0.756	0.844	0.685	0.666	0.485	0.882	0.571	0.478	0.504	0.85	0.874	0.73	0.89	0.852	0.739
	0.592	0.72	0.504	0.701	0.343	0.578	0.439	0.804	0.396	0.827	0.397	0.447	0.504	0.408	0.444	0.896	0.758	0.513	0.84	0.89	0.751	0.896	0.766	0.85
	0.53	0.645	0.698	0.707	0.763	0.844	0.423	0.378	0.642	0.647	0.44	0.525	0.7	0.771	0.714	0.641	0.793	0.68	0.85	0.89	0.852	0.53	0.846	0.85
	0.456	0.84	0.688	0.422	0.487	0.438	0.716	0.463	0.439	0.636	0.558	0.538	0.614	0.34	0.47	0.34	0.607	0.358	0.84	0.76	0.79	0.798	0.682	0.768
	0.494	0.445	0.61	0.352	0.515	0.674	0.859	0.818	0.575	0.63	0.369	0.349	0.857	0.356	0.65	0.42	0.652	0.896	0.689	0.664	0.864	0.827	0.9	0.855
	0.461	0.787	0.709	0.704	0.286	0.263	0.373	0.27	0.705	0.812	0.593	0.521	0.583	0.53	0.566	0.318	0.62	0.583	0.855	0.756	0.812	0.824	0.881	0.798
	0.615	0.642	0.904	0.477	0.522	0.529	0.447	0.522	0.556	0.653	0.613	0.572	0.387	0.645	0.537	0.644	0.62	0.492	0.85	0.852	0.846	0.769	0.732	0.862
	0.846	0.577	0.717	0.75	0.631	0.607	0.494	0.317	0.387	0.724	0.225	0.34	0.35	0.583	0.424	0.371	0.55	0.353	0.85	0.67	0.941	0.897	0.626	0.689
	0.42	0.356	0.536	0.442	0.938	0.438	0.316	0.624	0.683	0.709	0.335	0.289	0.563	0.44	0.327	0.35	0.408	0.489	0.741	0.758	0.866	0.832	0.782	0.636
	0.765	0.565	0.327	0.311	0.877	0.432	0.307	0.48	0.371	0.592	0.391	0.84	0.438	0.549	0.33	0.473	0.578	0.457	0.856	0.884	0.905	0.628	0.835	0.882
	0.587	0.392	0.367	0.508	0.452	0.484	0.466	0.313	0.65	0.693	0.279	0.709	0.402	0.569	0.485	0.675	0.506	0.338	0.856	0.907	0.518	0.494	0.874	0.924
	0.536	0.401	0.492	0.318	0.687	0.227	0.353	0.619	0.231	0.661	0.293	0.369	0.319	0.813	0.398	0.472	0.638	0.294	0.89	0.493	0.84	0.905	0.857	0.543
	0.439	0.617	0.923	0.352	0.747	0.524	0.307	0.342	0.483	0.63	0.17	0.531	0.353	0.56	0.353	0.593	0.347	0.406	0.862	0.866	0.832	0.894	0.785	0.852
	0.67	0.63	0.344	0.198	0.583	0.472	0.229	0.53	0.72	0.5	0.372	0.707	0.232	0.811	0.372	0.227	0.787	0.569	0.718	0.923	0.787	0.796	0.547	0.859
	0.661	0.367	0.18	0.43	0.202	0.201	0.666	0.522	0.209	0.58	0.303	0.532	0.492	0.565	0.479	0.615	0.633	0.201	0.848	0.765	0.882	0.486	0.917	0.832
	0.379	0.589	0.683	0.266	0.354	0.39	0.521	0.343	0.486	0.711	0.419	0.411	0.334	0.589	0.269	0.383	0.647	0.587	0.839	0.818	0.85	0.778	0.933	0.807
	0.436	0.577	0.369	0.438	0.245	0.323	0.325	0.463	0.267	0.692	0.297	0.766	0.43	0.605	0.496	0.396	0.562	0.511	0.76	0.787	0.782	0.955	0.547	0.828
	0.633	0.643	0.456	0.315	0.24	0.528	0.353	0.29	0.314	0.579	0.393	0.528	0.28	0.472	0.346	0.201	0.369	0.337	0.848	0.835	0.94	0.806	0.817	0.945
	0.601	0.416	0.293	0.472	0.375	0.498	0.162	0.491	0.368	0.316	0.342	0.612	0.392	0.432	0.512	0.704	0.204	0.274	0.766	0.919	0.913	0.792	0.707	0.677
	0.506	0.288	0.283	0.48	0.475	0.298	0.248	0.551	0.405	0.443	0.271	0.518	0.32	0.233	0.346	0.304	0.642	0.568	0.509	0.85	0.685	0.886	0.812	0.67
	0.575	0.316	0.295	0.266	0.422	0.325	0.154	0.427	0.501	0.402	0.254	0.566	0.577	0.652	0.502	0.224	0.494	0.301	0.751	0.899	0.823	0.823	0.927	0.805
	0.247	0.587	0.306	0.283	0.33	0.354	0.268	0.37	0.194	0.417	0.351	0.537	0.384	0.634	0.515	0.251	0.448	0.594	0.84	0.604	0.93	0.841	0.832	0.885
	0.39	0.242	0.494	0.312	0.287	0.275	0.388	0.532	0.333	0.286	0.355	0.332	0.504	0.471	0.458	0.368	0.458	0.37	0.852	0.89	0.916	0.909	0.906	0.94
	0.282	0.483	0.325	0.291	0.332	0.237	0.19	0.493	0.547	0.466	0.344	0.418	0.341	0.427	0.818	0.362	0.571	0.813	0.889	0.886	0.89	0.877	0.862	0.507
	0.463	0.667	0.252	0.269	0.249	0.517	0.384	0.226	0.421	0.472	0.342	0.582	0.45	0.746	0.514	0.439	0.503	0.241	0.785	0.667	0.625	0.728	0.827	0.886
	0.426	0.552	0.252	0.255	0.243	0.306	0.366	0.458	0.198	0.378	0.265	0.505	0.483	0.625	0.234	0.148	0.29	0.437	0.807	0.7	0.563	0.583	0.746	0.874
	0.373	0.358	0.333	0.262	0.346	0.361	0.334	0.248	0.329	0.215	0.349	0.224	0.366	0.566	0.535	0.304	0.371	0.464	0.889	0.834	0.917	0.918	0.726	0.572
	0.373	0.388	0.315	0.186	0.232	0.368	0.445	0.617	0.419	0.382	0.354	0.21	0.437	0.591	0.438	0.35	0.335	0.597	0.798	0.844	0.895	0.78	0.931	0.788
	0.32	0.377	0.161	0.184	0.263	0.258	0.308	0.499	0.374	0.183	0.343	0.327	0.521	0.492	0.357	0.328	0.672	0.184	0.807	0.88	0.916	0.937	0.534	0.705
	0.339	0.346	0.229	0.198	0.266	0.302	0.342	0.272	0.596	0.256	0.227	0.391	0.455	0.41	0.395	0.233	0.358	0.415	0.528	0.787	0.952	0.603	0.869	0.938
	0.388	0.269	0.178	0.251	0.308	0.356	0.287	0.459	0.44	0.505	0.323	0.233	0.225	0.582	0.317	0.355	0.511	0.322	0.655	0.835	0.865	0.532	0.542	0.496
	0.506	0.333	0.182	0.281	0.182	0.262	0.298	0.177	0.522	0.33	0.209	0.3	0.301	0.355	0.408	0.258	0.192	0.493	0.835	0.746	0.844	0.767	0.892	0.606
	0.327	0.21	0.28	0.238	0.297	0.135	0.28	0.333	0.366	0.211	0.213	0.454	0.253	0.633	0.383	0.223	0.362	0.247	0.85	0.901	0.949	0.908	0.758	0.529
	0.259	0.555	0.328	0.171	0.27	0.244	0.263	0.279	0.402	0.492	0.239	0.428	0.442	0.408	0.258	0.403	0.512	0.497	0.887	0.764	0.862	0.744	0.814	0.793
	0.487	0.351	0.267	0.134	0.185	0.26	0.389	0.285	0.394	0.233	0.312	0.488	0.284	0.483	0.492	0.297	0.5	0.353	0.913	0.797	0.874	0.8	0.559	0.681
	0.395	0.167	0.302	0.193	0.128	0.282	0.253	0.212	0.418	0.343	0.225	0.223	0.284	0.375	0.333	0.178	0.585	0.444	0.866	0.852	0.941	0.916	0.672	0.695
	0.364	0.245	0.32	0.171	0.274	0.238	0.274	0.362	0.384	0.282	0.165	0.319	0.173	0.459	0.374	0.325	0.395	0.449	0.845	0.853	0.88	0.841	0.947	0.862
	0.21	0.308	0.228	0.173	0.24	0.283	0.396	0.274	0.245	0.26	0.252	0.373	0.289	0.537	0.566	0.187	0.453	0.429	0.862	0.913	0.864	0.819	0.693	0.83
	0.16	0.137	0.19	0.177	0.186	0.257	0.316	0.186	0.333	0.195	0.253	0.25	0.407	0.398	0.221	0.223	0.429	0.333	0.787	0.527	0.884	0.696	0.753	0.843
	0.244	0.328	0.176	0.195	0.124	0.161	0.293	0.139	0.299	0.439	0.162	0.353	0.345	0.277	0.332	0.239	0.475	0.374	0.636	0.912	0.906	0.759	0.503	0.927
	0.328	0.389	0.223	0.147	0.212	0.256	0.201	0.148	0.451	0.268	0.195	0.286	0.23	0.449	0.233	0.198	0.387	0.665	0.802	0.83	0.9	0.746	0.236	0.881
	0.235	0.179	0.167	0.232	0.163	0.171	0.322	0.123	0.223	0.472	0.256	0.324	0.301	0.421	0.267	0.198	0.355	0.418	0.744	0.688	0.796	0.563	0.75	0.508
	0.217	0.24	0.132	0.142	0.174	0.152	0.242	0.202	0.28	0.332	0.141	0.318	0.158	0.396	0.284	0.251	0.236	0.314	0.655	0.758	0.655	0.83	0.79	0.898
	0.376	0.261	0.158	0.142	0.13	0.152	0.342	0.285	0.332	0.301	0.182	0.177	0.267	0.36	0.355	0.209	0.256	0.188	0.867	0.866	0.907	0.806	0.821	0.846
	0.414	0.174	0.12	0.247	0.163	0.122	0.194	0.354	0.264	0.256	0.14	0.204	0.355	0.431	0.303	0.189	0.392	0.359	0.769	0.794	0.583	0.724	0.538	0.794
	0.292	0.18	0.121	0.163	0.171	0.219	0.148	0.104	0.145	0.356	0.206	0.344	0.307	0.354	0.33	0.216	0.422	0.347	0.881	0.673	0.605	0.92	0.811	0.73
	0.364	0.204	0.104	0.088	0.183	0.164	0.24	0.149	0.18	0.271	0.163	0.315	0.163	0.361	0.303	0.123	0.292	0.347	0.785	0.731	0.894	0.828	0.753	0.475
	0.22	0.293	0.115	0.112	0.142	0.119	0.285	0.341	0.212	0.223	0.114	0.171	0.307	0.346	0.222	0.175	0.316	0.453	0.824	0.818	0.927	0.839	0.435	0.893
	0.34	0.338	0.08	0.168	0.116	0.145	0.254	0.197	0.123	0.39	0.103	0.166	0.28	0.216	0.253	0.126	0.365	0.435	0.938	0.562	0.866	0.704	0.523	0.862
	0.228	0.258	0.099	0.107	0.124	0.139	0.247	0.307	0.254	0.206	0.174	0.252	0.099	0.293	0.389	0.241	0.257	0.353	0.754	0.801	0.602	0.753	0.641	0.809
	0.426	0.25	0.089	0.113	0.168	0.135	0.149	0.181	0.223	0.212	0.084	0.269	0.184	0.17	0.226	0.213	0.257	0.498	0.918	0.488	0.739	0.503	0.577	0.919
	0.368	0.223	0.076	0.118	0.119	0.21	0.233	0.213	0.17	0.187	0.107	0.226	0.336	0.343	0.316	0.217	0.282	0.201	0.732	0.612	0.728	0.327	0.775	0.646
	0.376	0.258		0.172	0.135	0.142	0.353	0.116	0.148	0.261	0.081	0.277	0.158	0.355	0.231	0.129	0.252	0.426	0.88	0.738	0.885	0.491	0.585	0.921
	0.31	0.233		0.128	0.103	0.143	0.274	0.216	0.188	0.196	0.138	0.153	0.237	0.215	0.244	0.113	0.199	0.23	0.85	0.467	0.696	0.62	0.586	0.874
	0.237	0.217		0.087	0.081	0.191	0.182	0.236	0.175	0.264	0.1	0.264	0.423	0.292	0.33	0.204	0.256	0.227	0.9	0.502	0.945	0.77	0.513	0.896
	0.241	0.282		0.12	0.117	0.162	0.273	0.137	0.203	0.232	0.116	0.179	0.316	0.262	0.193	0.152	0.229	0.266	0.475	0.575	0.736	0.756	0.573	0.634
	0.291	0.222		0.099	0.072	0.158	0.199	0.212	0.136	0.136	0.106	0.31	0.144	0.33	0.357	0.163	0.281	0.256	0.744	0.429	0.803	0.815	0.805	0.732
	0.192	0.16		0.086		0.139	0.198	0.1	0.111	0.117	0.112	0.197	0.244	0.321	0.17	0.077	0.264	0.312	0.932	0.836	0.575	0.673	0.485	0.637
	0.357	0.207		0.084		0.173	0.279	0.188	0.146	0.199	0.076	0.215	0.292	0.243	0.248	0.077	0.205	0.23	0.844	0.761	0.895	0.752	0.744	0.683
	0.339	0.167		0.089		0.166	0.221	0.146		0.259	0.114	0.164	0.287	0.245	0.256	0.063	0.171	0.257	0.626	0.529	0.572	0.424	0.518	0.747
	0.23	0.186		0.088		0.166	0.155	0.159		0.187	0.051	0.205	0.26	0.237	0.193		0.226	0.215	0.825	0.569	0.753	0.903	0.567	0.508
	0.255	0.213		0.089		0.152	0.156	0.23		0.252		0.182	0.246	0.222	0.281		0.171	0.438	0.796	0.562	0.878	0.633	0.622	0.46
	0.243	0.197		0.061		0.141	0.112	0.146		0.188		0.126	0.156	0.17	0.187		0.205	0.353	0.83	0.645	0.651	0.845	0.662	0.371
	0.355	0.212				0.153	0.194	0.155		0.191		0.247	0.16	0.135	0.158		0.254	0.15	0.954	0.725	0.835	0.728	0.796	0.822
	0.228	0.15				0.109	0.186	0.18		0.198		0.237	0.282	0.227	0.155		0.227	0.324	0.845	0.622	0.789	0.825	0.541	0.896
	0.253	0.169				0.104	0.127	0.156		0.114		0.182	0.16	0.159	0.179		0.27	0.297	0.874	0.483	0.684	0.565	0.789	0.746
	0.312	0.109				0.17	0.196	0.103		0.156		0.176	0.124	0.245	0.158		0.149	0.224	0.767	0.661	0.775	0.508	0.326	0.897
	0.332	0.103				0.146	0.106	0.093		0.201		0.214	0.241	0.145	0.143		0.18	0.262	0.885	0.604	0.837	0.406	0.46	0.83
	0.189	0.131				0.087	0.148	0.132		0.191		0.135	0.149	0.195	0.147		0.205	0.205	0.957	0.482	0.569	0.371	0.472	0.757
	0.206	0.142				0.063	0.087	0.126		0.173		0.097	0.203	0.233	0.111		0.154	0.224	0.636	0.573	0.859	0.864	0.494	0.63
	0.291	0.13				0.093	0.074			0.199		0.136	0.167	0.085	0.184		0.145	0.34	0.9	0.638	0.743	0.803	0.547	0.784
	0.268	0.096				0.045	0.092			0.112		0.127	0.195	0.166	0.074		0.132	0.286	0.517	0.547	0.56	0.554	0.403	0.873
	0.133	0.079					0.093			0.222		0.107	0.149	0.123	0.146		0.17	0.156	0.568	0.323	0.628	0.597	0.372	0.72
	0.3	0.075								0.084		0.159	0.249	0.117	0.2		0.166	0.247	0.933	0.51	0.676	0.799	0.608	0.561
	0.196									0.142		0.113	0.123	0.182	0.174		0.136	0.196	0.745	0.42	0.352	0.584	0.453	0.514
	0.192									0.117		0.104	0.133		0.176		0.111	0.222	0.678	0.597	0.539	0.692	0.355	0.779
	0.134									0.173		0.095	0.13		0.196		0.158	0.133	0.832	0.51	0.488	0.582	0.574	0.866
	0.246									0.099		0.111	0.147		0.132		0.111	0.159	0.84	0.554	0.549	0.857	0.398	0.539
	0.183									0.135		0.113	0.129		0.113		0.11	0.175	0.566	0.608	0.64	0.663	0.512	0.797
	0.259									0.111		0.097	0.169				0.086	0.194	0.864	0.419	0.613	0.697	0.245	0.589
	0.207									0.105		0.096	0.068					0.161	0.545	0.635	0.716	0.594	0.427	0.898
	0.16									0.12		0.097	0.133					0.107	0.884	0.564	0.441	0.801	0.345	0.301
	0.198									0.122		0.088	0.062						0.567	0.37	0.588	0.807	0.306	0.816
	0.181									0.085		0.064							0.687	0.196	0.606	0.553	0.363	0.871
	0.134									0.098									0.716	0.295	0.518	0.578	0.261	0.562
	0.164									0.063									0.617	0.637	0.522	0.62	0.196	0.535
	0.147																		0.666	0.469	0.64	0.583	0.191	0.589
	0.145																		0.36	0.326	0.559	0.806		0.704
	0.249																		0.778	0.488	0.342	0.797		0.579
	0.138																		0.475	0.532	0.502	0.447		0.658
	0.136																		0.405	0.424	0.599	0.373		0.655
	0.132																		0.686	0.415	0.513	0.582		0.651
	0.119																		0.689	0.318	0.583	0.606		0.659
	0.113																		0.606	0.433	0.392	0.468		0.685
	0.111																		0.524	0.383	0.469	0.575		0.419
	0.107																		0.661	0.406	0.374	0.424		0.618
	0.083																		0.85	0.47	0.359	0.48		0.473
	0.071																		0.646	0.307	0.415	0.577		0.456
	0.068																		0.469	0.596	0.419	0.26		0.351
																			0.775	0.478	0.394	0.705		0.692
																			0.803	0.473	0.486	0.66		0.648
																			0.85	0.408	0.451	0.435		0.56
																			0.628	0.341	0.329	0.426		0.453
																			0.608	0.452	0.481	0.346		0.428
																			0.8	0.492	0.28	0.63		0.574
																			0.553	0.305	0.207	0.603		0.285
																			0.471	0.463	0.322	0.563		0.467
																			0.723	0.362	0.165	0.527		0.354
																			0.632	0.352	0.3	0.564		0.447
																			0.639	0.314		0.356		0.608
																			0.474	0.238		0.474		0.392
																			0.383	0.166		0.523		0.441
																			0.422	0.227		0.652		0.472
																			0.691	0.253		0.523		0.455
																			0.459	0.292		0.578		0.306
																			0.528	0.257		0.386		0.472
																			0.57	0.278		0.612		0.372
																			0.482	0.33		0.593		0.474
																			0.561	0.197		0.274		0.517
																			0.409			0.625		0.427
																			0.484			0.35		0.455
																			0.682			0.54		0.371
																			0.584			0.446		0.516
																			0.303			0.6		0.422
																			0.478			0.601		0.36
																			0.477			0.573		0.314
																			0.474			0.412		0.334
																			0.478			0.391		0.38
																			0.592			0.537		0.404
																			0.364			0.475		0.362
																			0.456			0.439		0.364
																			0.403			0.373		0.387
																			0.412			0.366		0.294
																			0.231			0.511		0.237
																			0.437			0.431
																			0.266			0.44
																			0.252			0.363
																			0.473			0.387
																			0.367			0.441
																			0.374			0.393
																			0.331			0.495
																			0.381			0.168
																			0.303			0.463
																			0.318			0.327
																			0.308			0.426
																			0.351			0.247
																			0.305			0.244
																			0.231			0.275
																			0.334			0.206
																			0.342
																			0.314
																			0.248
																			0.202
																			0.304
																			0.341
																			0.234
