# Supplementary material for: Chemoptogenetic ablation of neuronal mitochondria in vivo with spatiotemporal precision and controllable severity
Source: eLife. 2020 Mar 17;9:e51845. doi: 10.7554/eLife.51845 (PMC7077989; doi:10.7554/eLife.51845)
Supplement: Figure 5—source data 4. [file elife-51845-fig5-data4.xlsx]

## Sheet: Figure 5G
Electron microscopy
	Group	Time point	Image #	# of mitochondria	# abnormal mitochondria	% abnormal mitochondria in image
	NeuMitoFAP; MG2I+	Pre-light	1	7	0	0
			2	6	0	0
			3	2	0	0
			4	4	0	0
			5	7	0	0
			6	10	0	0
			7	8	0	0
			8	5	0	0
			9	5	0	0
			10	8	0	0
			11	11	0	0
			12	10	0	0
		Immediate post-light	1	6	6	100
			2	5	5	100
			3	3	3	100
			4	10	7	70
			5	12	9	75
			6	3	3	100
			7	8	8	100
			8	4	4	100
			9	9	9	100
			10	5	5	100
			11	4	3	75
			12	4	4	100
		24 hours post-light	1	2	2	100
			2	2	2	100
			3	11	7	63.6364
			4	3	3	100
			5	10	10	100
			6	6	6	100
			7	11	11	100
			8	3	3	100
			9	2	2	100
			10	10	10	100
			11	16	16	100
			12	4	4	100
	NeuMitoFAP; No chemical	Pre-light	1	5	0	0
			2	9	0	0
			3	7	0	0
			4	3	0	0
			5	5	0	0
			6	6	0	0
			7	6	0	0
			8	6	0	0
			9	5	0	0
			10	2	0	0
			11	5	0	0
			12	8	0	0
		Immediate post-light	1	6	0	0
			2	3	0	0
			3	10	0	0
			4	8	0	0
			5	6	1	16.6667
			6	4	0	0
			7	7	0	0
			8	6	0	0
			9	2	0	0
			10	8	0	0
			11	4	0	0
			12	5	0	0
		24 hours post-light	1	4	0	0
			2	10	0	0
			3	5	0	0
			4	4	0	0
			5	6	0	0
			6	7	0	0
			7	5	0	0
			8	4	0	0
			9	8	0	0
			10	6	0	0
			11	5	0	0
			12	6	0	0
