# Supplementary material for: Chemoptogenetic ablation of neuronal mitochondria in vivo with spatiotemporal precision and controllable severity
Source: eLife. 2020 Mar 17;9:e51845. doi: 10.7554/eLife.51845 (PMC7077989; doi:10.7554/eLife.51845)
Supplement: Figure 6—source data 1. [file elife-51845-fig6-data1.xlsx]

## Sheet: Figure 6D
Acridine Orange labeled cells
			Non-Tg, MG2I+
		pre-light	11	8	12	6	8	5	10	14	7	11	5	10	13	12	11	8
	Hours post-light	0	11	9	17	5	9	6	7	8	12	7	7	5	2	9	5	10
		1	2	3	9	5	8	6	5	3	4	5	5	12	8	6	7	10
		2	12	4	16	10	12	5	6	6	7	13	7	6	7	7	10	6
		6	6	5	10	4	8	7	9	11	14	14	6	11	3	10	9	13
		12	19	16	4	12	9	15	10	8	11	2	12	6	17	21	14	9
		24	14	7	11	9	15	5	13	10	7	6	5	14	9	11	9	10
		48	12	13	13	10	11	7	16	8	7	21	18	12	16	19	14	9
			NeuMitoFAP, MG2I+
		pre-light	9	13	14	11	12	20	16	29	35	31	24	20	17	21	6	9
	Hours post-light	0	27	35	26	31	19	30	16	24	26	21	39	42	20	19	34	36
		1	43	40	39	43	45	41	37	86	92	65	31	56	29	41	39	44
		2	88	104	53	89	49	75	51	42	118	41	104	47	61	67	51	53
		6	50	86	91	100	114	58	159	103	122	67	39	102	100	154	123	82
		12	191	143	142	240	156	207	236	283	247	224	163	199	166	176	271	220
		24	359	207	244	298	312	322	399	377	276	284	320	408	365	231	274	334
		48	312	339	268	239	433	408	254	254	249	331	236	194	234	263	266	278
			NeuMitoFAP, no chemical
		pre-light	12	8	7	15	9	10	8	9	13	10	14	8	11	9	8	8
	Hours post-light	0	16	9	4	8	11	5	12	4	14	6	10	5	7	15	9	7
		1	21	8	14	10	22	4	10	19	8	11	11	13	6	5	8	13
		2	10	14	6	7	11	12	13	12	7	11	17	3	8	5	5	9
		6	13	15	21	11	6	8	5	8	9	19	5	7	12	4	20	7
		12	10	5	11	9	7	12	7	14	14	12	4	11	16	6	5	8
		24	4	2	10	12	10	12	7	8	9	21	14	11	6	11	8	7
		48	8	11	10	7	10	6	12	14	10	12	9	11	11	9	14	18
			each data point is total number of AO-labeled cells in the spinal cord of an individual zebrafish larva at the indicated time point.
